# Supplementary material for: Identification of Sclareol As a Natural Neuroprotective Cav1.3‐Antagonist Using Synthetic Parkinson‐Mimetic Gene Circuits and Computer‐Aided Drug Discovery
Source: PubMed Central journal article supplement (PMC8895113; doi:10.1002/advs.202102855), 2022-01-18
Supplement: ADVS-9-2102855-s003.pdf [file ADVS-9-2102855-s003.pdf]

## Supporting Information

for *Adv. Sci.*, DOI: 10.1002/advs.202102855

Identification of Sclareol As a Natural Neuroprotective  
Ca<sub>v</sub>1.3-Antagonist Using Synthetic Parkinson-Mimetic  
Gene Circuits and Computer-Aided Drug Discovery

*Hui Wang, Mingqi Xie, Giorgio Rizzi, Xin Li, Kelly Tan,\* and Martin  
Fussenegger\**

## Supporting Information

### Identification of sclareol as a natural neuroprotective Cav1.3-antagonist using synthetic Parkinson-mimetic gene circuits and computer-aided drug discovery

Hui Wang<sup>1</sup>, Mingqi Xie<sup>1</sup>, Giorgio Rizzi<sup>2</sup>, Xin Li<sup>1</sup>, Kelly Tan<sup>2,\*</sup> and Martin Fussenegger<sup>1,3\*</sup>

#### Methods

**Vector Design.** Mouse Cav1.2  $\alpha$ 1C (GenBank accession number AY728090, Addgene plasmid #26572), rat Cav1.3 $\alpha$ 1D (GenBank accession number: AF370009, Addgene plasmid # 49333), rat Cav1.3 $\alpha$ 1D: $\Delta$ 42a (GenBank accession number: AF370010, Addgene plasmid # 49332), rat Cav $\beta$ 3 (GenBank accession number: M88751, Addgene plasmid # 26574) and rat Cav $\alpha$ 2 $\delta$ -1 (GenBank accession number: AF286488, Addgene plasmid # 26575) were provided by Prof. Diane Lipscombe (Brown University). ClonExpress® MultiS One Step Cloning Kit (cat. no. C113-01) was purchased from Vazyme Biotech Co. Ltd. (Nanjing, China).

**Cell culture and transfection.** Human embryonic kidney cells (HEK-293T, ATCC: CRL-11268) were cultured in Dulbecco's modified Eagle's medium (DMEM; Invitrogen, Basel, Switzerland; cat. no. 52100–39) supplemented with 10% (v/v) fetal bovine serum (FBS; Sigma-Aldrich, Buchs, Switzerland; cat. no. F7524, lot no. 022M3395) and 1% (v/v) penicillin/streptomycin solution (PenStrep; Biowest, Nuaille, France; cat. no. L0022-100). Cells were cultured at 37°C in a humidified atmosphere of 5% CO<sub>2</sub> in air. For passaging, cells of pre-confluent cultures were detached by incubation in 0.05% trypsin-EDTA (Life Technologies, CA, USA; cat. no. 25300-054) for 3 min at 37°C, collected in 10 ml of cell culture medium, centrifuged for 3 min at 290 g, and resuspended in fresh culture medium at 1.5 x 10<sup>5</sup> cells/mL, before seeding into new tissue culture plates. Cell number and viability were quantified using an electric field multichannel cell counting device (Casy Cell Counter and Analyzer Model TT, Roche Diagnostics GmbH). HEK-293T cells were transfected using a polyethyleneimine (PEI)-based protocol. In brief, 2 x 10<sup>5</sup> cells/ml cells were seeded into 48-well plates (225  $\mu$ l medium per well), 6-well plates (1800  $\mu$ l medium per well), or 10 cm petri dishes (9 mL medium). At 24 h after seeding, cells were incubated for 12 h with 50  $\mu$ l, 100  $\mu$ l or 400  $\mu$ l of a 10:3 PEI:DNA mixture (w/w), containing 0.3-0.4  $\mu$ g (48-well plate), 2.4-3  $\mu$ g (6-well plate), or 11-13  $\mu$ g of total DNA (10 cm petri dish), respectively. For

experiments performed in 24-well plates, the culture medium was exchanged to PEI-free medium containing defined concentrations of control compounds after 12 h. For experiments performed in 6-well plates or 10-cm dishes, transfected cells were detached with 0.05% trypsin-EDTA, re-seeded into 96-well plates (15000-40000 cells/well), and cultured in medium containing defined concentrations of control compounds. Analytical reporter assays were performed at 48 h after medium exchange.

**Chemicals and drugs.** Ethanol (EtOH; cat. no. 02860), sclareol (cat. no. 357995), linalool oxide (cat. no. 62141), zingerone (cat. no. 88787), Cremophor (cat. no. C5135) and dimethyl sulfoxide (DMSO; cat. no. D8418) were purchased from Sigma-Aldrich (Buchs, Switzerland). Polyethyleneimine (PEI; cat. no. 24765-2; stock solution 1 mg/ml in ddH<sub>2</sub>O) was purchased from Polysciences (Eppelheim, Germany). (6)-Gingerol (cat. no. sc-201519) and diethyl phthalate (cat. no. sc-239738) were purchased from Santa Cruz Biotechnology (Heidelberg, Germany). Potassium chloride (KCl; cat. no. A3582; stock solution 4 M in ddH<sub>2</sub>O) was purchased from AppliChem (Darmstadt, Germany). Calcium channel blocker (CCB) drugs (**Table S8**) and plant essential oils (**Table S2**) were stored in DMSO and diluted with DMEM to final working concentrations. Final DMSO levels in the cell culture medium were kept below 0.4%.

**Quantification of target gene expression.** Expression levels of human placental secreted alkaline phosphatase (SEAP) in culture supernatants were quantified based on p-nitrophenyl phosphate-derived light absorbance at 415 nm<sup>28</sup>. Gaussia Luciferase (GLuc) levels in culture supernatants were profiled using the BioLux® Gaussia luciferase assay kit (New England Biolabs, Ipswich, MA; cat. no. E3300). Fluorescence levels of HEK-293T cells grown in a black 96-well plate with a transparent bottom (Greiner Bio-one; cat. no. 655090) and cultivated in phenol red-free DMEM (ThermoFisher Scientific, cat. no. 21063029) were quantified with a microplate reader (Infinite M1000 PRO plate reader, Tecan Group Ltd). TurboGFP levels were recorded at excitation 460/9 nm, emission 502/20 nm. dsRed-Express levels were recorded at excitation 554/9 nm, emission 586/20 nm.

**Fluorescence imaging.** Fluorescence microscopy was performed with an inverted fluorescence microscope (Nikon Ti-E; Nikon) equipped with an incubation chamber, an Orca Flash-4 digital camera (Hamamatsu), a pE-100-LED (CoolLED) as the transmission light source, a Spectra X (Lumencor) as the fluorescent light source and a 4× objective, an excitation and emission filter set (TurboGFP: 475/525 nm; dsRed-Express 549/593 nm) and NIS Elements AR software (version 4.3.0).

**Locomotion.** Mice were placed in the center of a rectangular open arena (30 cm in width and 45 cm in length, with 30 cm tall walls) for 10 minutes. The miniscope was placed and secured on the head, then the mouse was translocated into the open arena, where its position was tracked and recorded on a downward-facing camera with ANYMAZE.

## Supplementary Figures

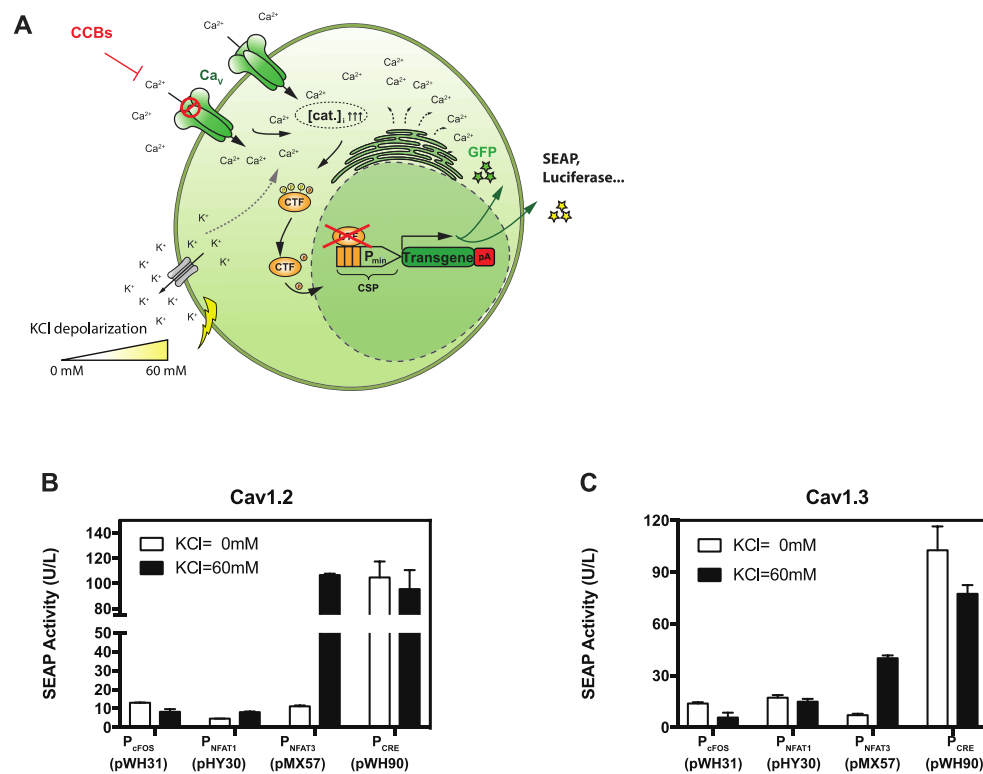

**Figure S1. Principles of Ca<sub>v</sub>1-specific designer cell-based screening assays. (A) Synthetic excitation-transcription coupling.** In human embryonic kidney (HEK-293) cells, membrane depolarization activates L-type voltage-gated calcium channels (Ca<sub>v</sub>1) and triggers Ca<sup>2+</sup> influx, activation of endogenous calcium-responsive transcriptional factors (CTFs) and initiation of reporter gene transcription from synthetic cognate calcium-specific promoters (CSPs) containing CTF-specific response elements. Inhibition of Ca<sub>v</sub>1 by specific calcium channel blockers (CCBs) antagonizes membrane depolarization and attenuates Ca<sup>2+</sup>-dependent gene regulation. **(B, C) Selection of synthetic CSPs to quantify depolarization-dependent Ca<sub>v</sub>1 signaling.** (B) Ca<sub>v</sub>1.2 (pCa<sub>v</sub>1.2/ pKK56)- or (C) Ca<sub>v</sub>1.3 (pCa<sub>v</sub>1.3:Δ42/pKK56)-transgenic HEK-293 cells were co-transfected with pWH31 (P<sub>cFOS</sub>-

SEAP-pA), pHY30 ( $P_{NFAT1}$ -SEAP-pA), pMX57 ( $P_{NFAT3}$ -SEAP-pA) or pWH90 ( $P_{CRE2}$ -SEAP-pA) and cultivated in the presence or absence of 60 mM potassium chloride (KCl). SEAP levels in culture supernatants were scored after 48 h. Data are shown as mean  $\pm$  SD (n=3 independent experiments).

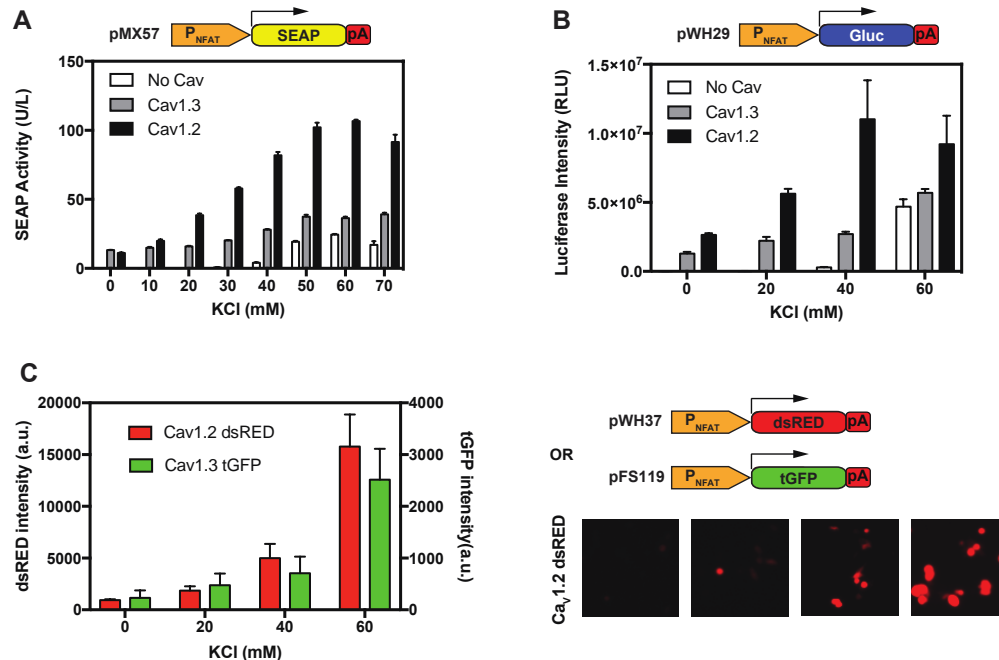

**Figure S2. Depolarization-inducible reporter gene expression.** (A) **KCl-triggered SEAP expression.** HEK-293 cells were co-transfected with pMX57 ( $P_{NFAT3}$ -SEAP-pA), pKK56 ( $P_{hEF1\alpha}$ -Cacna2d1-P2A-Cacnb3-pA) and either  $Ca_v1.2$  ( $pCa_v1.2$ ;  $P_{hCMV}$ -Cacna1c-pA),  $Ca_v1.3$  ( $pCa_v1.3:\Delta 42$ ;  $P_{hCMV}$ -Cacna1d: $\Delta 42$ -pA) or no  $Ca_v$  ( $pcDNA3.1(+)$ ;  $P_{hCMV}$ -MCS-pA), and depolarized with KCl (0-70 mM). SEAP levels in culture supernatants were scored after 48 h. (B) **KCl-triggered GLuc expression.** Isogenic HEK-293 cells to (A) were transfected with a GLuc-expressing reporter vector (pWH29;  $P_{NFAT3}$ -Gluc-pA) instead of pMX57 and cultivated in cell culture medium containing different levels of KCl (0-60 mM). GLuc levels in culture supernatants were scored after 48 h. (C) **KCl-triggered expression of GFP and DsRed.** Isogenic HEK-293 cells to (A) were transfected with reporter vectors expressing DsRed (pWH37;  $P_{NFAT3}$ -DsRed-Express-pA) or tGFP (pFS119;  $P_{NFAT3}$ -TurboGFP:dest1-pA) instead of pMX57, and depolarized with KCl (0-60 mM). Fluorescence levels were recorded after 48 h by quantitative microplate reading (left; a.u., arbitrary unit) or microscopy (right). All data are presented as mean  $\pm$  SD (n=3 independent experiments).

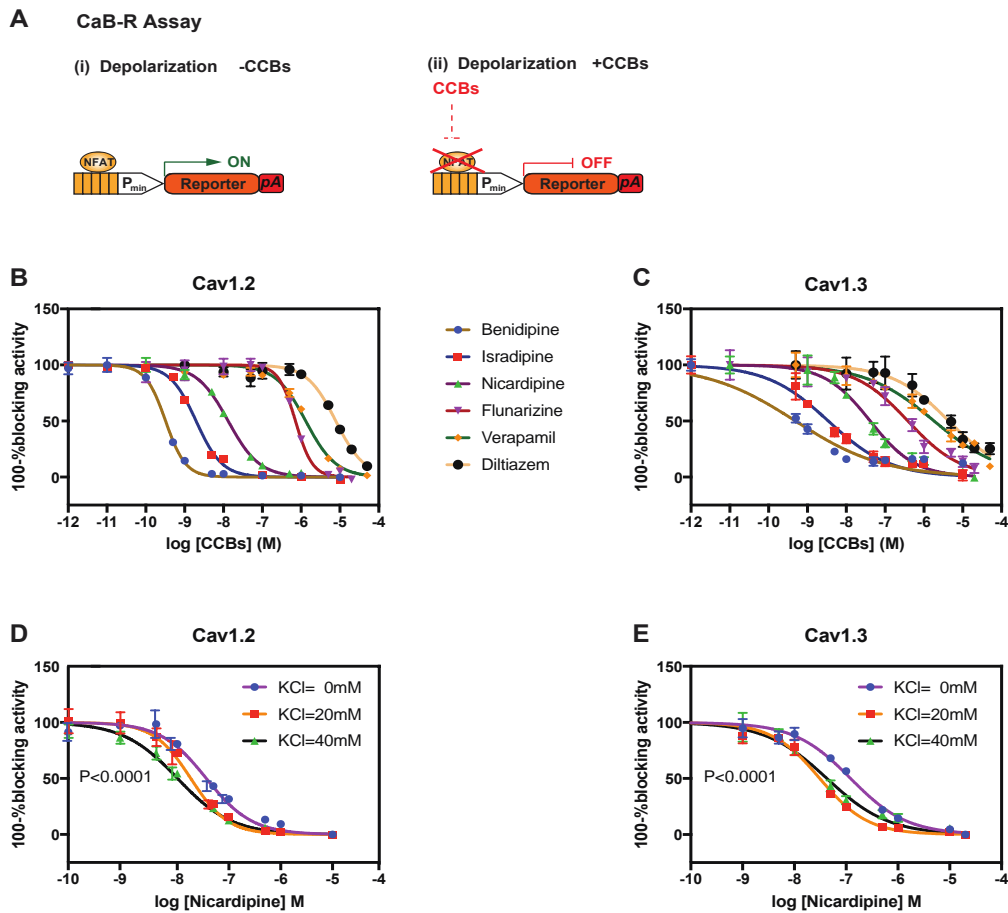

**Figure S3. Design and validation of a calcium channel blocker-repressible (CaB-R) reporter assay. (A) Design principle.** The presence of calcium channel blockers (CCBs) prevents reporter protein expression by inhibiting depolarization-dependent activation of endogenous NFAT (nuclear factor of activated T-cells) signaling. **(B, C) Validation of dose-dependent CaB-R with clinically approved CCBs.** (B) Cav<sub>v</sub>1.2 (pCav<sub>v</sub>1.2/pKK56/pMX57)- or (C) Cav<sub>v</sub>1.3 (pCav<sub>v</sub>1.3:Δ42/pKK56/pMX57)-transgenic HEK-293 cells were depolarized with 40 mM KCl and immediately placed in culture wells containing different concentrations of CCBs. **(D, E) Validation of CaB-R for analysis of use-dependent CCBs.** (D) Cav<sub>v</sub>1.2 (pCav<sub>v</sub>1.2/pKK56/pMX57)- or (E) Cav<sub>v</sub>1.3 (pCav<sub>v</sub>1.3:Δ42/pKK56/pMX57)-transgenic HEK-293 cells were depolarized with different levels of KCl (0, 20, 40 mM) and immediately added to culture wells containing different concentrations of nicardipine. SEAP levels in (B-E) were scored at 48 h after exposure to CCBs. Data are shown as mean percentage of relative blocking activity, normalized to maximal depolarization-dependent SEAP levels (0%; 40 mM KCl, no CCB) and maximal CCB blocking activity (100%; 10 μM nicardipine). Statistics of (D-E) were analyzed by means of an extra-sum-of-squares F test (n=3 independent experiments).

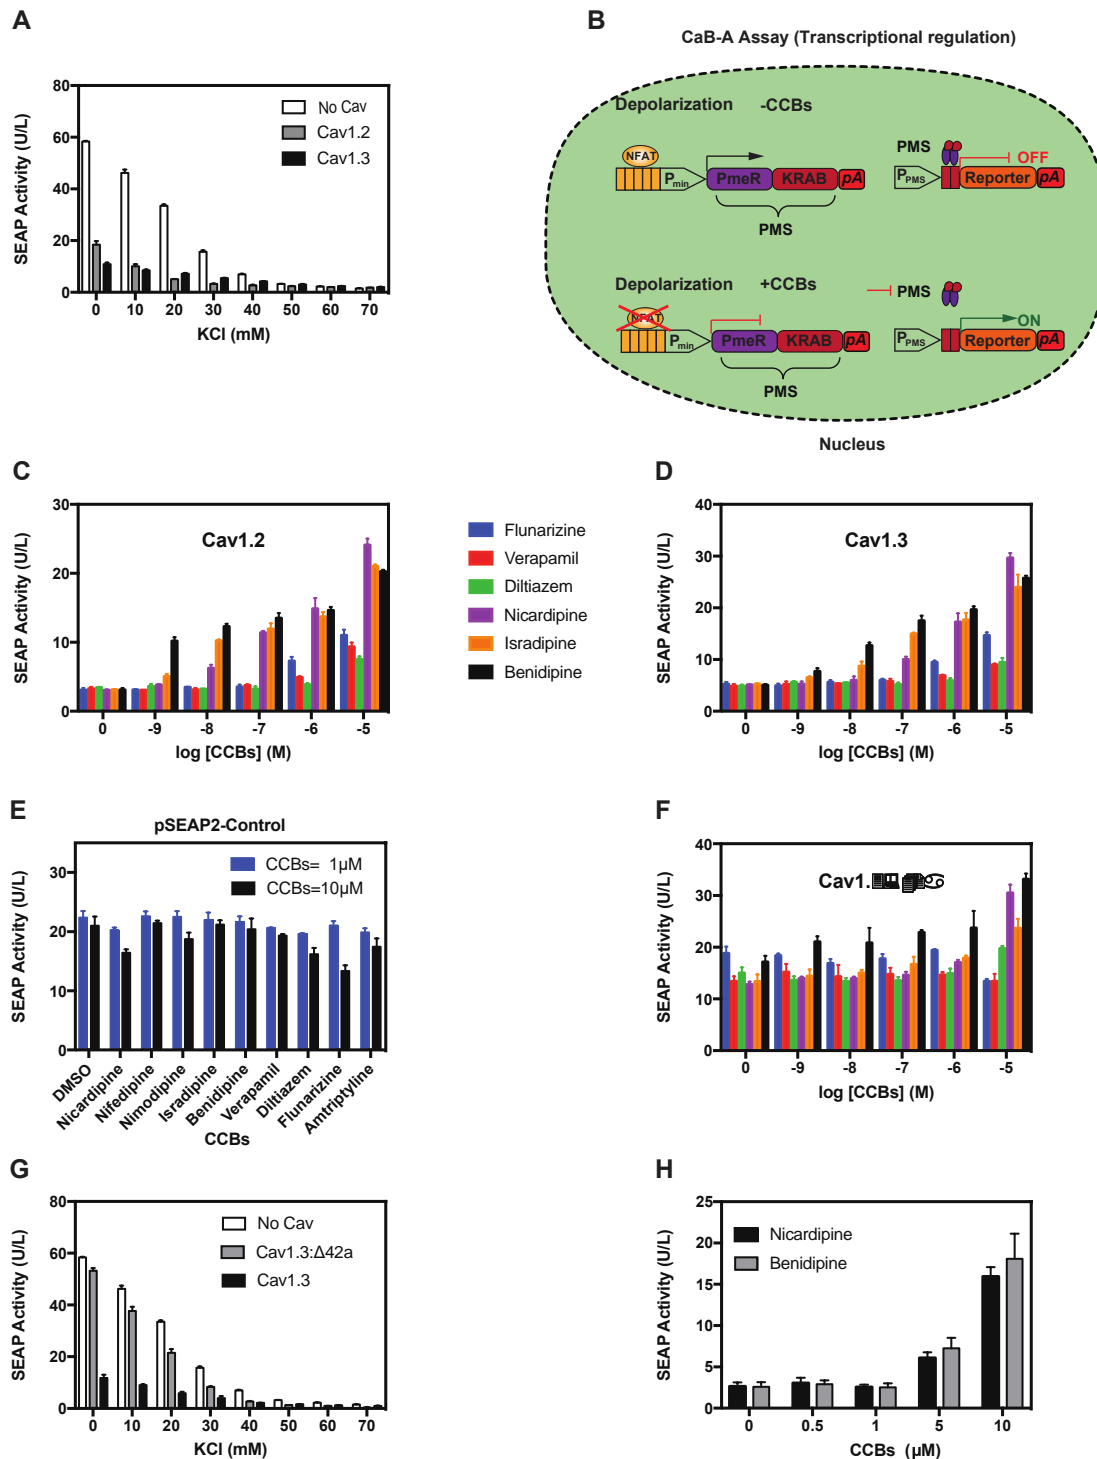

**Figure S4. Design and validation of a calcium channel blocker-activated (CaB-A) reporter assay.** (A) **Depolarization-repressible reporter protein expression.** HEK-293 cells were co-transfected with pWH5 ( $P_{PMS}$ -SEAP-pA), pWH75 ( $P_{NFAT4}$ -PMS-pA), pKK56 ( $P_{hEF1\alpha}$ -Cacna2d1-P2A-Cacnb3-pA) and either Cav1.2 ( $pCav1.2$ ;  $P_{hCMV}$ -Cacna1c-pA), Cav1.3 ( $pCav1.3$ ;  $P_{hCMV}$ -Cacna1d-pA) or no Cav ( $pCNA3.1(+)$ ;  $P_{hCMV}$ -MCS-pA), and depolarized

with KCl (0-70 mM) and SEAP levels in culture supernatants were scored after 48 h. Data are presented as mean  $\pm$  SD (n=3 independent experiments). **(B) Transcription-based CaB-A.** Synthetic NFAT-promoters control the production of the synthetic mammalian trans-silencer (PMS), which silences reporter gene transcription controlled by binding to synthetic cognate promoters ( $P_{PMS}$ ). Calcium channel blockers (CCBs) activate reporter protein expression by inhibiting depolarization-dependent PMS-expression. **(C, D) Dose-dependent CaB-A activity.** (C)  $Ca_v1.2$  ( $pCa_v1.2/pKK56/pWH75/pWH5$ )- or (D)  $Ca_v1.3$  ( $pCa_v1.3/pKK56/pWH75/pWH5$ )-transgenic HEK-293 cells were depolarized with 30 mM KCl and immediately placed in culture wells containing different concentrations of CCBs. Data are shown as mean  $\pm$  SD of SEAP levels scored at 48 h after exposure to CCBs (n=3 independent experiments). **(E) Cytotoxicity control of CCBs.** HEK-293 cells were transfected with pSEAP2-Control ( $P_{SV40}$ -SEAP-pA) and cultivated for 48 h in cell culture medium containing 1  $\mu$ M or 10  $\mu$ M CCBs. Data are shown as mean  $\pm$  SD (n=3 independent experiments). **(F, G) Splice variant-dependent CaB-A activity.** (F)  $Ca_v1.3:\Delta 42$ -transgenic HEK-293 cells ( $pCa_v1.3:\Delta 42/pKK56/pWH75/pWH5$ ) were depolarized with 30 mM KCl and immediately placed in culture wells containing different concentrations of CCBs. (G) HEK-293 cells expressing  $Ca_v1.3$  ( $pCa_v1.3/pKK56/pWH75/pWH5$ ),  $Ca_v1.3:\Delta 42$  ( $pCa_v1.3:\Delta 42/pKK56/pWH75/pWH5$ ) or no  $Ca_v$  (pcDNA3.1(+);  $P_{hCMV}$ -MCS-pA) were cultivated in cell culture medium containing different KCl levels (0-70 mM). Data in (F, G) are shown as mean  $\pm$  SD of SEAP levels scored at 48 h after addition of KCl (n=3 independent experiments). **(H) Impact of CCBs on PMS activity.** HEK-293 cells were co-transfected with pWH9 ( $P_{SV40}$ -PMS-pA) and pWH5 ( $P_{PMS}$ -SEAP-pA), and cultivated in culture medium containing different concentration of nifedipine or benidipine. Data are shown as mean  $\pm$  SD of SEAP levels scored at 48 h after exposure to CCBs (n=3 independent experiments).



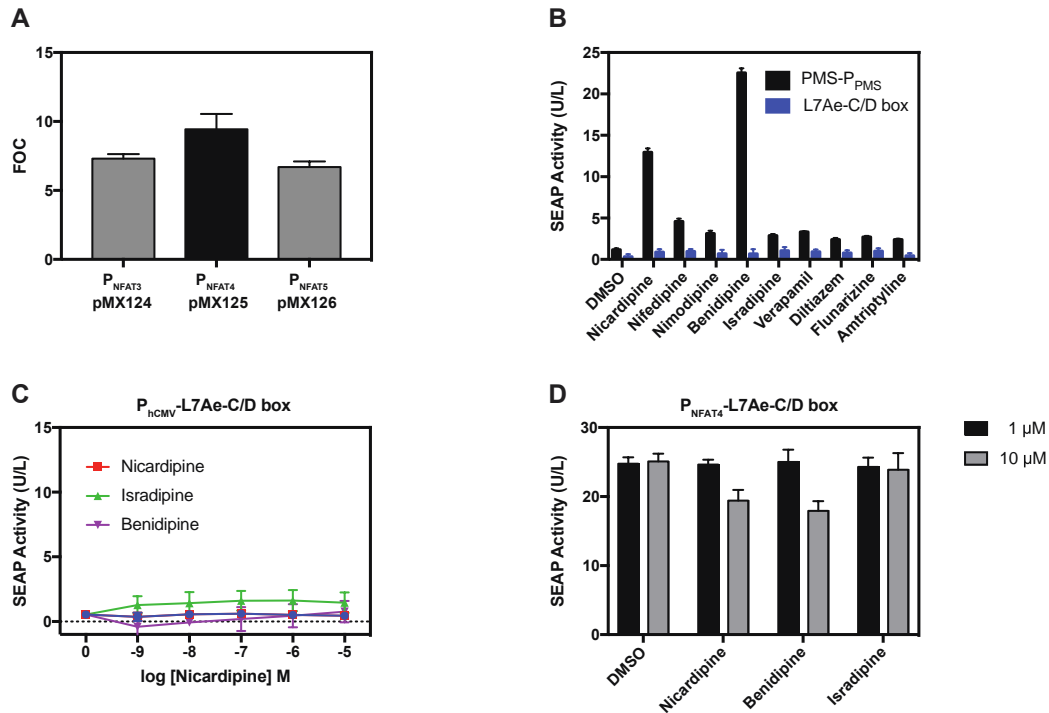

**Figure S5. Control experiments of the translation-based (CaB-A) reporter assay. (A) Promoter optimization for NFAT-dependent L7Ae expression.** HEK-293 cells were co-transfected with pCav1.2, pKK56, pMX199 and different L7Ae expression vectors containing five (pMX124; P<sub>NFAT3</sub>-L7Ae-pA), seven (pMX125; P<sub>NFAT4</sub>-L7Ae-pA) or nine (pMX126; P<sub>NFAT5</sub>-L7Ae-pA) tandem repeats of NFAT response elements, depolarized with 20 mM KCl and immediately placed in culture wells containing 0 or 10 μM nicardipine. Data points are presented as mean FOC (fold of control, DMSO) of SEAP levels scored at 48 h after exposure to nicardipine (n=3 independent experiments). **(B-D) Impact of CCBs on NFAT-controlled repressors.** (B) Transcription- (PMS-P<sub>PMS</sub>; pWH9/pWH5) or translation-based (L7Ae-C/D box; pWH145/pMX199; pWH145, P<sub>hCMV</sub>-L7Ae-pA) control systems were cultivated for 48 h in cell culture medium containing 0 μM (DMSO control) or 10 μM CCBs. (C) pWH145/pMX199-transgenic HEK-293 cells were cultivated for 48 h in cell culture medium containing different concentrations of CCBs. (D) pMX125/pMX199-transgenic HEK-293 cells were cultivated for 48 h in cell culture medium containing 1 μM or 10 μM CCBs. Data in (B-D) are shown as mean ± SD of SEAP levels scored at 48 h after exposure to CCBs (n=3 independent experiments).

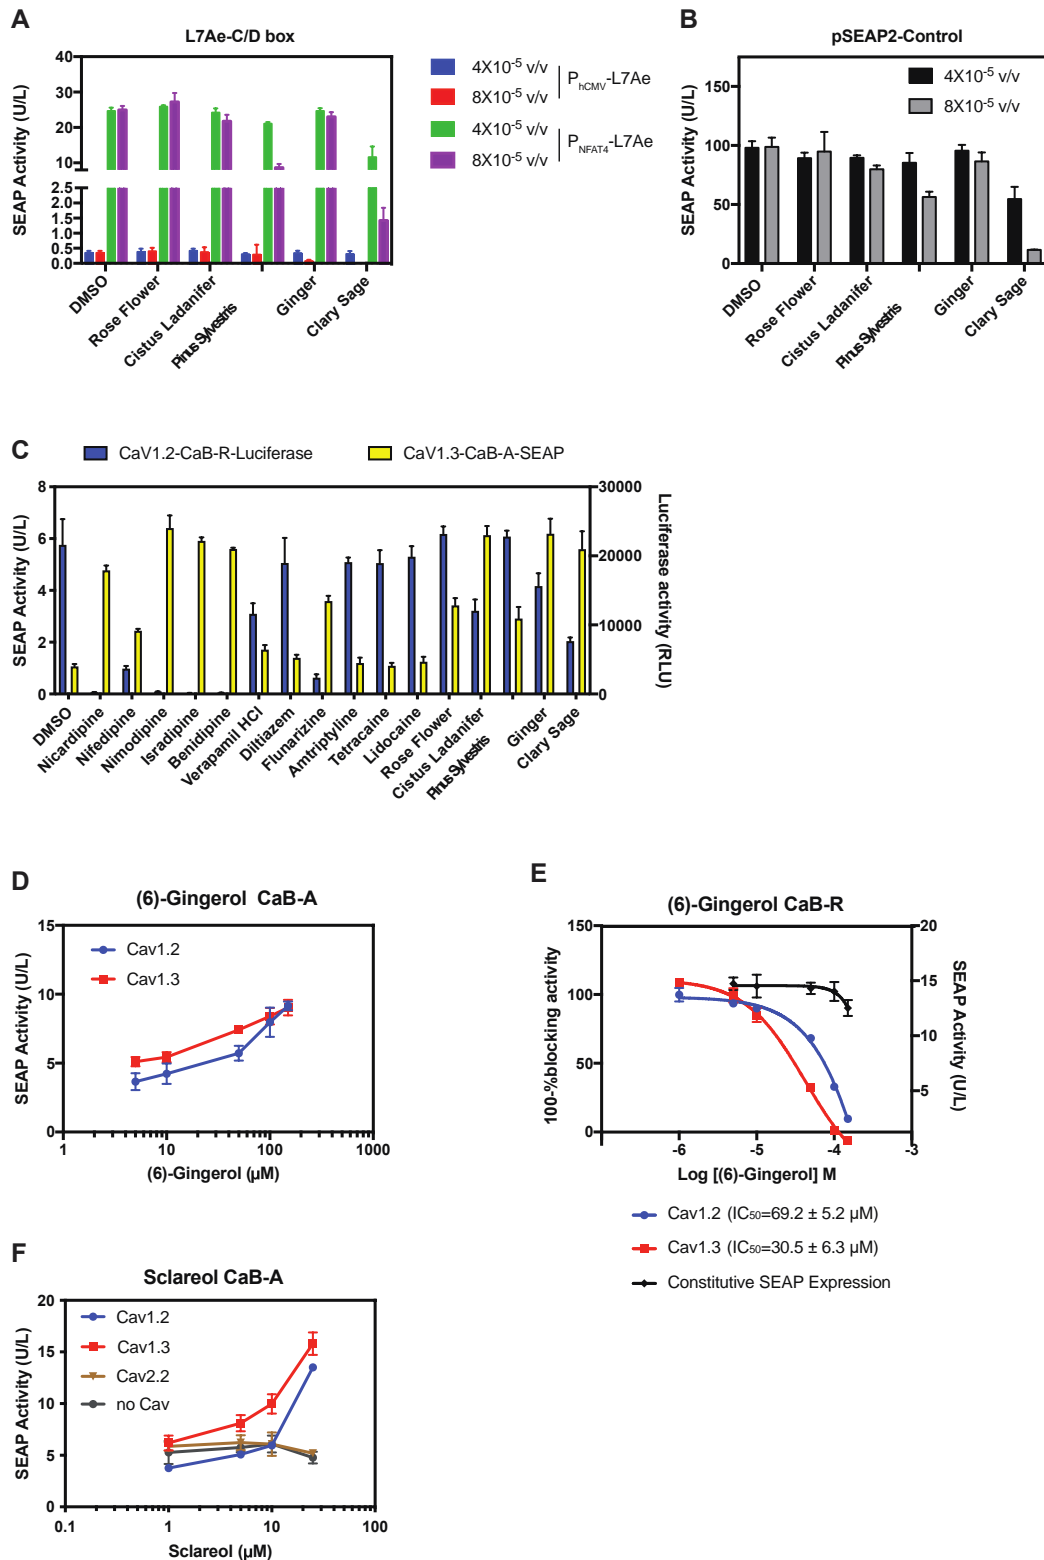

**Figure S6. Identification of putative anti-Parkinson drug candidates. (A) Impact of plant essential oils on L7Ae-dependent control systems.** pWH145/pMX199 (P<sub>hCMV</sub>-L7Ae)- or pMX125/pMX199 (P<sub>NFAT4</sub>-L7Ae)-transgenic HEK-293 cells were depolarized with 20 mM KCl and cultivated for 48 h in cell culture medium containing different levels of plant essential oils (4 x 10<sup>-5</sup> or 8 x 10<sup>-5</sup> v/v). **(B) Cytotoxicity control of plant essential oils.** HEK-

293 cells were transfected with pSEAP2-Control ( $P_{SV40}$ -SEAP-pA) and cultivated for 48 h in cell culture medium containing different levels of plant essential oils ( $4 \times 10^{-5}$  or  $8 \times 10^{-5}$  v/v). All data are shown as mean  $\pm$  SD of SEAP levels scored at 48 h after exposure to essential oils (n=3 independent experiments). **(C) Validation of CaB-A for multiplexed drug screening.** Independent  $Ca_v1.2$ -specific CaB-R (pCa<sub>v</sub>1.2/pKK56/pWH29) and  $Ca_v1.3$ -specific CaB-A (pCa<sub>v</sub>1.3/pKK56/pMX125/pMX199) systems were mixed, depolarized with 30 mM KCl, and added to culture wells supplemented with different plant essential oils ( $4 \times 10^{-5}$  v/v) or CCBs (10  $\mu$ M). Data are shown as mean  $\pm$  SD of reporter proteins scored at 48 h after exposure to antagonists (n=3 independent experiments). Levels of the DMSO solvent (control) in cell culture medium were kept below 0.4%. **(D) Quantification of Ca<sub>v</sub>1 antagonism by (6)-gingerol using CaB-A.** HEK-293 cells transfected with  $Ca_v1.2$ - or  $Ca_v1.3$ -dependent CaB-A were depolarized with 30 mM KCl and immediately seeded into culture wells containing different concentrations of (6)-gingerol. Data are shown as mean  $\pm$  SD of SEAP levels scored at 48 h after drug exposure (n = 3 independent experiments). **(E) Quantification of Ca<sub>v</sub>1 antagonism by (6)-gingerol using CaB-R.** HEK-293 cells transfected with  $Ca_v1.2$ - or  $Ca_v1.3$ -dependent CaB-R were depolarized with 30 mM KCl and immediately seeded into culture wells containing different concentrations of (6)-gingerol. HEK-293 cells transfected with a constitutive SEAP-expression vector (pSEAP2-Control;  $P_{SV40}$ -SEAP-pA) were used as a reference for putative cytotoxicity caused by drug exposure. Data are mean  $\pm$  SD of SEAP levels scored at 48 h after drug exposure (n = 3 independent experiments). **(F) Quantification of Ca<sub>v</sub>1 antagonism by sclareol using CaB-A.** HEK-293 cells transfected with  $Ca_v1.2$ - or  $Ca_v1.3$ -dependent CaB-A were depolarized with 30 mM KCl and immediately seeded into culture wells containing different concentrations of sclareol. HEK-293 cells transfected with a bacterial expression vector (pViM41;  $P_{T7}$ -mCherry-MCS) or  $Ca_v2.2$  (pCa<sub>v</sub>2.2;  $P_{hCMV}$ -Cacna1b-pA) instead of  $Ca_v1.2$ - or  $Ca_v1.3$  were used as negative controls indicating  $Ca_v$ -unrelated or L-type  $Ca_v$ -unrelated assay readouts, respectively. Data are shown as mean  $\pm$  SD of SEAP levels scored at 48 h after drug exposure (n = 3 independent experiments).

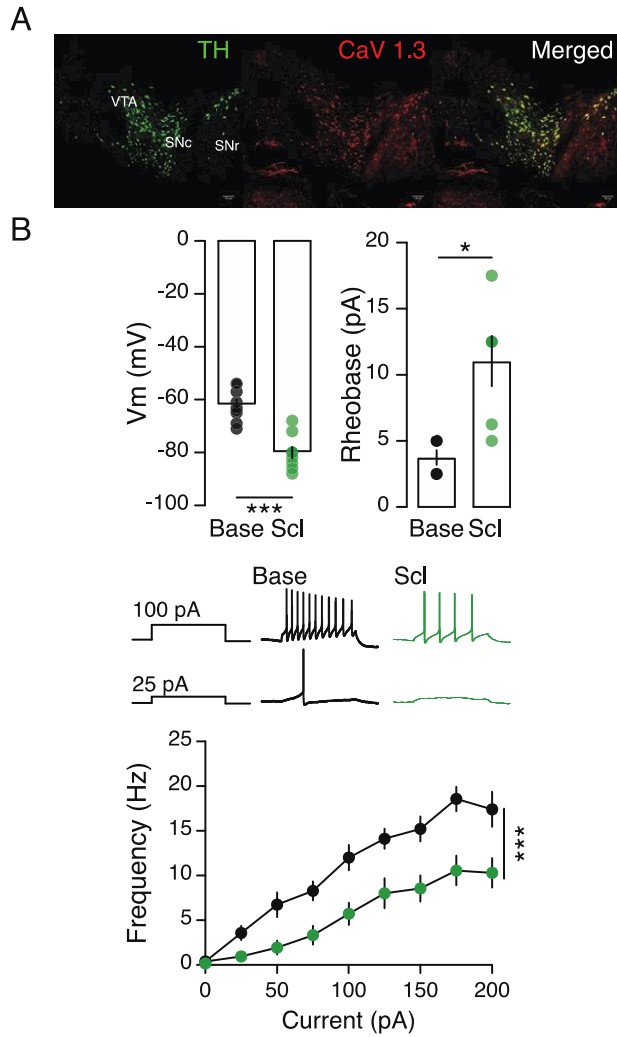

**Figure S7. Sclareol hyperpolarizes SNc DA neurons.** (A) Typical confocal image of midbrain-containing brain tissues stained for CaV1.3 (red) and TH (green) ( $n = 3$  mice). (B) Sclareol bath application ( $10 \mu\text{M}$ ) leads to SNc DA cell inhibition as revealed by neuronal hyperpolarisation ( $n = 9$  cells) and a concomitant increase of rheobase ( $n = 7$  cells) and downward shift of the firing activity ( $n=13$  cells). Data are shown as the mean  $\pm$  SEM, statistics by paired t-test (Vm and Rheobase) or two-way repeated-measures ANOVA test (input output curve). \*  $p < 0.05$ , \*\*\*  $p < 0.001$ .

**Movie S1.** Concomitant locomotion tracking and striatal calcium dynamics of an example vehicle-treated mouse. The movies are sped up 4 times and show motor activity (upper videos) and striatal calcium activity (lower videos). These were recorded on the baseline session (left) and day 30 of the experiment (right).

**Movie S2.** Concomitant locomotion tracking and striatal calcium dynamics of an example sclareol-treated mouse. The movies are sped up 4 times and show motor (upper videos) and striatal calcium activities (lower videos). These were recorded on the baseline session (left) and day 30 of the experiment (right).

## Supplementary Tables

**Table S1.** IC<sub>50</sub> values of FDA-approved calcium channel blockers (CCBs) on Ca<sub>v</sub>1.2 and Ca<sub>v</sub>1.3

| Class            | Compound      | IC <sub>50</sub> (Ca <sub>v</sub> 1.2) |                                   |                                  | IC <sub>50</sub> (Ca <sub>v</sub> 1.3) |                                   |                                  |
|------------------|---------------|----------------------------------------|-----------------------------------|----------------------------------|----------------------------------------|-----------------------------------|----------------------------------|
|                  |               | Literature range                       | Physiological<br>KCl=0 mM<br>(nM) | Depolarized<br>KCl=40 mM<br>(nM) | Literature range                       | Physiological<br>KCl=0 mM<br>(nM) | Depolarized<br>KCl=40 mM<br>(nM) |
| Dihydropyridine  | Nicardipine   | 13-160nM <sup>1-4</sup>                | 45.8±9.0                          | 12.7±2.3                         | n/A                                    | 112±28.0                          | 41.4±13.5                        |
|                  | Nimodipine    | 3-139nM <sup>4,5</sup>                 | 33.2±7.1                          | 15.7±1.9                         | 2.7-3μM <sup>5,6</sup>                 | 16.5±3.6                          | 3.0±1.6                          |
|                  | Isradipine    | 0.4-29.7nM <sup>5,7</sup>              | 4.7±0.6                           | 1.9±0.2                          | 0.5-30nM <sup>5,7</sup>                | 18.4±4.6                          | 3.5±1.4                          |
|                  | Benidipine    | n/A                                    | 0.73±0.1                          | 0.28±0.03                        | n/A                                    | 3.7±1.1                           | 0.49±0.45                        |
| Phenylalkylamine | Verapamil     | 0.7 – 35.3μM <sup>1,4</sup>            | 6527±801                          | 1263±208                         | 199μM <sup>8</sup>                     | 6179±1315                         | 1836±652                         |
| Benzothiazepine  | Diltiazem     | 1.8-33.0μM <sup>1,2,4,5</sup>          | 9859±1359                         | 6238±1591                        | 326μM <sup>8</sup>                     | 13340±2570                        | 4387±2159                        |
| Nonselective     | Flunarizine   | 0.1–11μM <sup>9</sup>                  | 1086±235                          | 531.3±47.4                       | 0.1–11μM <sup>9</sup>                  | 562±187                           | 387±163                          |
| Others           | Amitriptyline | 23.2μM <sup>10</sup>                   | 8872±1087                         | 4688±933                         | 23.2μM <sup>10</sup>                   | 7815±1797                         | 9169±2224                        |

Values are mean ±SD of 3 independent experiments.

**Table S2.** Essential oils used in this manuscript

| <b>Essential oil</b> | <b>Source</b>                                            |
|----------------------|----------------------------------------------------------|
| 1 Caraway            | Golgemma, Esperaza, France                               |
| 2 Nutmeg             | Golgemma, Esperaza, France                               |
| 3 Peppermint         | Primavera Life GmbH, Oy-Mittelberg, Germany              |
| 4 Rosemary           | Vie Arôme, Montreuil, France                             |
| 5 Petit Grain        | Golgemma, Esperaza, France                               |
| 6 Lemon              | Golgemma, Esperaza, France                               |
| 7 Savory             | Golgemma, Esperaza, France                               |
| 8 Neroli             | Golgemma, Esperaza, France                               |
| 9 Rose Flower        | Vie Arôme, Montreuil, France                             |
| 10 Cajeput           | Golgemma, Esperaza, France                               |
| 11 Coriander         | Vie Arôme, Montreuil, France                             |
| 12 Geranium Bourbon  | Welfine Beijing Science & Technology Ltd, Beijing, China |
| 13 Cistus Ladanifer  | Welfine Beijing Science & Technology Ltd, Beijing, China |
| 14 Thyme Thymol      | Welfine Beijing Science & Technology Ltd, Beijing, China |
| 15 Marjoram          | Vie Arôme, Montreuil, France                             |
| 16 Cinnamon Bark     | Vie Arôme, Montreuil, France                             |
| 17 Pinus Sylvestris  | Vie Arôme, Montreuil, France                             |
| 18 Bitter Orange     | Vie Arôme, Montreuil, France                             |
| 19 Cumin             | Golgemma, Esperaza, France                               |
| 20 Rosewood          | Vie Arôme, Montreuil, France                             |
| 21 Sandalwood        | Golgemma, Esperaza, France                               |
| 22 Ginger            | Primavera Life GmbH, Oy-Mittelberg, Germany              |
| 23 Maritime Pine     | Golgemma, Esperaza, France                               |
| 24 Camomile          | Golgemma, Esperaza, France                               |
| 25 Basil             | Vie Arôme, Montreuil, France                             |
| 26 Clove             | Primavera Life GmbH, Oy-Mittelberg, Germany              |
| 27 Verbena           | Golgemma, Esperaza, France                               |
| 28 Clary Sage        | Vie Arôme, Montreuil, France                             |
| 29 Cupressus         | Vie Arôme, Montreuil, France                             |
| 30 Spearmint         | Primavera Life GmbH, Oy-Mittelberg, Germany              |

|                   |                                                          |
|-------------------|----------------------------------------------------------|
| 31 Palma Rosa     | Golgamma, Esperaza, France                               |
| 32 Oregano        | Golgamma, Esperaza, France                               |
| 33 Juniper        | Vie Arôme, Montreuil, France                             |
| 34 Lemongrass     | Golgamma, Esperaza, France                               |
| 35 Thyme Vulgaris | Welfine Beijing Science & Technology Ltd, Beijing, China |
| 36 Winter Savory  | Welfine Beijing Science & Technology Ltd, Beijing, China |
| 37 Bay tree       | Golgamma, Esperaza, France                               |
| 38 Clove nutmeg   | Golgamma, Esperaza, France                               |
| 39 Fine Lavender  | Golgamma, Esperaza, France                               |
| 40 Myrtle         | Golgamma, Esperaza, France                               |
| 41 Ylang-ylang    | Vie Arôme, Montreuil, France                             |
| 42 Thyme Linalool | Vie Arôme, Montreuil, France                             |

**Table S3.** Reference compounds for the generation of Ca<sub>v</sub>1.3-inhibiting pharmacophores

| <b>Positive reference (known Ca<sub>v</sub>1 blockers)</b>            | <b>Negative reference (Ca<sub>v</sub>-independent blockers)</b> |
|-----------------------------------------------------------------------|-----------------------------------------------------------------|
| Benidipine                                                            | Amtriptyline                                                    |
| Cilnidipine                                                           | Lidocaine                                                       |
| Nimordipine                                                           | Tetracaine                                                      |
| Isradipine                                                            |                                                                 |
| Nicardipine                                                           |                                                                 |
| Nifedipine                                                            |                                                                 |
| Flunarizine                                                           |                                                                 |
| Verapamil                                                             |                                                                 |
| Diltiazem                                                             |                                                                 |
| Pyrimidine-2,4,6,-trione                                              |                                                                 |
| 1-(3-chlorophenethyl)-3-cyclopentylpyrimidine-2,4,6-(1H,3H,5H)-trione |                                                                 |



**Table S4.** Virtual Screening Experiment

a. 309 compounds from 5 essential oils:

| SMILES                                      | Chemical Name                                     |
|---------------------------------------------|---------------------------------------------------|
| <b>Ciste essential oil</b>                  |                                                   |
| <chem>CC1=CCC2CC1C2(C)C</chem>              | A-PINENE                                          |
| <chem>CC1(C2CC1C(=C)C(C2)O)C</chem>         | (-)-TRANS-PINOCARVEOL                             |
| <chem>CC1CCC2C1C3C(C3(C)C)CCC2(C)O</chem>   | LEDOL                                             |
| <chem>CC(=O)C1=CC=CC=C1</chem>              | ACETOPHENONE                                      |
| <chem>CC(=O)OC1CC2CCC1(C2(C)C)C</chem>      | BORNYL ACETATE                                    |
| <chem>CC1=CCC(CC1)(C(C)C)O</chem>           | TERPINEN-4-OL                                     |
| <chem>CC1=CC=C(C=C1)C(C)C</chem>            | P-CYMENE                                          |
| <chem>CC1CC(=NO)CC(C1)(C)C</chem>           | 3,3,5-Trimethylcyclohexanone                      |
| <chem>CC(=O)OC1(CCCC(C1=O)(C)C)C</chem>     | 2-Acetoxy-2,6,6-trimethylcyclohexanone            |
| <chem>CC1(C2CCC(C2)(C1O)C)C</chem>          | 1,3,3-Trimethylbicyclo[2.2.1]heptan-2-ol          |
| <chem>CC1(C2CCC(C2)(C1=O)C)C</chem>         | 1,3,3-Trimethylbicyclo[2.2.1]heptan-2-one         |
| <chem>CC1(C2CCC1(C(=O)C2)C)C</chem>         | Camphor 1,7,7-trimethylbicyclo[2.2.1]heptan-2-one |
| <chem>CC1(C2CCC1(C(C2)O)C)C</chem>          | BORNEOL                                           |
| <chem>CC1=CC(=O)C2CC1C2(C)C</chem>          | (-)-VERBENONE                                     |
| <chem>CC1(C2CC=C(C1C2)CO)C</chem>           | MYRTENOL                                          |
| <chem>CC1=CCC(CC1)C(=C)C</chem>             | LIMONENE                                          |
| <chem>CC1(CCC(O1)C(C)(C)O)C=C</chem>        | LINALOOL OXIDE                                    |
| <chem>CC1=CC=C(C=C1)C(C)(C)O</chem>         | 8-HYDROXY-P-CYMENE                                |
| <chem>CC1=CC=C(C=C1)C(C)C</chem>            | DIHYDRO P-CYMENE                                  |
| <chem>C1=CC=C(C=C1)CCO</chem>               | <chem>CC1=CC=C(C=C1)C(C)C</chem>                  |
| <chem>CC1(C2CC=C(C1C2)C=O)C</chem>          | MYRTENAL                                          |
| <chem>CC1CCC2C1C3C(C3(C)C)CCC2=C</chem>     | ALLOAROMADENDRENE                                 |
| <chem>CC1(C2CCC(C2)C1=C)C</chem>            | CAMPHENE                                          |
| <chem>CC(C)C1CCC2(C3C1C4C2(C4C3)C)C</chem>  | (+)-CYCLOSATIVENE                                 |
| <chem>CC1=CC2C(CCC(=C2CC1)C)C(C)C</chem>    | (+)-DELTA-CADINENE                                |
| <chem>CC1=CCC(C=CCC(=CCC1)C)(C)C</chem>     | humulene                                          |
| <chem>CC1CCC23C1C4C(C4(C)C)CCC2(O3)C</chem> | ledene oxide                                      |
| <chem>CCCCC=CC(=O)C</chem>                  | trans-3-Nonen-2-one                               |
| <chem>CC(=CCCC(C)(C=C)O)C</chem>            | LINALOOL                                          |
| <chem>CC1(C2CCC(O1)(CC2)C)C</chem>          | EUCALYPTOL                                        |
| <chem>CC1=CCC(CC1=O)C(=C)C</chem>           | CARVONE                                           |
| <chem>CC1CCC(CC2=C1CCC2C)C(=C)C</chem>      | A-GUAIENE                                         |

|                                                           |                                |
|-----------------------------------------------------------|--------------------------------|
| <chem>CC(CCCC(C)(C)O)C=C</chem>                           | DIHYDROMYRCENOL                |
| <chem>CC(=O)OCC1=CCC2CC1C2(C)C</chem>                     | MYRTENYL ACETATE               |
| <chem>CC1=CCC2C3C1C2(CCC3C(C)C)C</chem>                   | COPAENE                        |
| <chem>CC1=CC(=O)CC(C1)(C)C</chem>                         | ISOPHORONE                     |
| <chem>CC1=C(C=CC(=C1)C(=O)C)O</chem>                      | 4-Hydroxy-3-methylacetophenone |
| <chem>CC1=CC=C(C=C1)C(=O)C</chem>                         | P-METHYLACETOPHENONE           |
| <chem>COC1=C(C=CC(=C1)CC=C)O</chem>                       | EUGENOL                        |
| <chem>CC(CCC=C(C)C)CCO</chem>                             | CITRONELLOL                    |
| <chem>CC1=CC(=C(C=C1)C(C)C)O</chem>                       | THYMOL                         |
| <chem>CC(C)C1=CC=C(C=C1)CO</chem>                         | P-CYMEN-7-OL                   |
| <chem>CC1CCOC(C1)C=C(C)C</chem>                           | ROSE OXIDE                     |
| <chem>CC1(C2CCC(=C)C1C2)C</chem>                          | B-PINENE                       |
| <chem>CC(=CCCC(=O)C)C</chem>                              | 6-Methyl-5-hepten-2-one        |
| <chem>CC1(C2CC3C1(C3C2)C)C</chem>                         | TRICYCLENE                     |
| <chem>CC1=CCC(=C(C)C)CC1</chem>                           | Terpinolene                    |
| <chem>CC1=CCC(=CC1)C(C)C</chem>                           | GAMMA-TERPINENE                |
| <chem>CC1(C2CCC(O1)(CC2)C)C</chem>                        | EUCALYPTOL                     |
| <chem>CC1=CCC(C=C1)C(C)C</chem>                           | ALPHA-PHELLANDRENE             |
| <b>Ginger essential oil</b>                               |                                |
| <chem>CCCCCC(CC(=O)CCC1=CC(=C(C=C1)O)OC)O</chem>          | 6-Gingerol                     |
| <chem>CCCC(CC(=O)CCC1=CC(=C(C=C1)O)OC)O</chem>            | (4)-Gingerol                   |
| <chem>CCCCCCCCCCC(CC(=O)CCC1=CC(=C(C=C1)O)OC)O</chem>     | (10)-Gingerol                  |
| <chem>CCCCCCCC(CC(=O)CCC1=CC(=C(C=C1)O)OC)O</chem>        | (8)-Gingerol                   |
| <chem>CCCCCC=CC(=O)CCC1=CC(=C(C=C1)O)OC</chem>            | 6-Shogaol                      |
| <chem>CC1=CCC(C=C1)C(C)CCC=C(C)C</chem>                   | l-Zingiberene                  |
| <chem>CC(CCC=C(C)C)C1CCC(=C)C=C1</chem>                   | B-sesquiphellandrene           |
| <chem>CC1=CCC(CC1)C(=C)CCC=C(C)C</chem>                   | B-BISABOLENE                   |
| <chem>CC1(C2CCC(C2)C1=C)C</chem>                          | (+)-Camphene                   |
| <chem>CC1(C2CCC(C2)C1=C)C</chem>                          | (-)-Camphene                   |
| <chem>CC1=CC=C(C=C1)C(C)CCC=C(C)C</chem>                  | A-CURCUMENE                    |
| <chem>CC(C)C1CCC(=C)C=C1</chem>                           | B-PHELLANDRENE                 |
| <chem>CC(=CCCC(=CCC=C(C)C=C)C)C</chem>                    | A-FARNESENE                    |
| <chem>CC1=CC2C(CC1)C(=C)CCC2C(C)C</chem>                  | GAMA-MUUROLENE                 |
| <chem>CC1(C2CCC(O1)(CC2)C)C</chem>                        | EUCALYPTOL                     |
| <chem>CC1=CCC2CC1C2(C)C</chem>                            | A-PINENE                       |
| <chem>CC1CCC(C2C13C2C(=CC3)C)C(C)C</chem>                 | Alpha-Cubebene                 |
| <chem>CC1CCC(C2C13C2C(=C)CC3)C(C)C</chem>                 | Beta-Cubebene                  |
| <chem>CC1=CCC(CC1)C(=C)C</chem>                           | (+)LIMONENE                    |
| <chem>CC1(C2CCC1(C(C2)O)C)C</chem>                        | ENDO-BORNEOL                   |
| <chem>CC(=C)[C@@H]1CC[C@@]1([C@@H](C1)C(=C)C)C(C)C</chem> | B-ELEMENE                      |

|                                             |                               |
|---------------------------------------------|-------------------------------|
| <chem>=C</chem>                             |                               |
| <chem>CCCC=C(C)C(=O)C</chem>                | 3-Methylhept-3-en-2-one       |
| <chem>CC(=CCCC(=O)C)C</chem>                | Methyl Heptenone              |
| <chem>CC(=CCCC(=C)C=C)C</chem>              | MYRCENE                       |
| <chem>CC(=C1CCC(C(C1)C(=C)C)(C)C=C)C</chem> | GAMA-ELEMENE                  |
| <chem>CC1=CCC(CC1)C(C)(C)O</chem>           | A-TERPINEOL                   |
| <chem>CCCCCC=O</chem>                       | HEXANAL                       |
| <chem>CC1=CCC2C3C1C2(CCC3C(C)C)C</chem>     | COPAENE                       |
| <chem>CC(=C)C1CC(CCC1(C)C=C)C(C)(C)O</chem> | ELEMOL                        |
| <chem>CC(=CCCC(=CCCC(C)(C=C)O)C)C</chem>    | NEROLIDOL                     |
| <chem>CC(=CCCC(=CCOC(=O)C)C)C</chem>        | GERANYL ACETATE               |
| <chem>CC1=CCCC2(C1CC(CC2)C(=C)C)C</chem>    | A-SELINENE                    |
| <chem>CC1CCC2C1C3C(C3(C)C)CCC2=C</chem>     | ALLOAROMADENDRENE             |
| <chem>CC(C)C1CCC2(C3C1C4C2(C4C3)C)C</chem>  | (+)-CYCLOSATIVENE             |
| <chem>CC1=CCC(CC1)(C(C)CCC=C(C)C)O</chem>   | B-BISABOLOL                   |
| <chem>CCCCCCCCC=O</chem>                    | DECANAL                       |
| <chem>CC1(C2CCC(=C)C1C2)C</chem>            | B-PINENE                      |
| <chem>CC12CCCC(=C)C1CC(CC2)C(C)(C)O</chem>  | B-EUDESOL                     |
| <chem>CC(=CCC/C(=C/CO)/C)C</chem>           | GERANIOL                      |
| <chem>CC1=CCC(C=C1)C(C)C</chem>             | A-PHELLANDRENE                |
| <chem>CC(=CCCC(C)(C=C)O)C</chem>            | LINALOOL                      |
| <chem>CC(=C1CCC(C(C1)C(=C)C)(C)C=C)C</chem> | GAMA-ELEMENE                  |
| <chem>CCCCCCCCC=O</chem>                    | OCTANAL                       |
| <chem>CCCCCCCCC(=O)C</chem>                 | METHYL NONYL KETONE           |
| <chem>CC1=CCC(=C(C)C)CC1</chem>             | TERPINOLENE                   |
| <chem>CC1=CC(=C(C(=C1)O)C)C</chem>          | 2,3,5,6-TETRAMETHYL<br>PHENOL |
| <chem>CC(=CCCC1(C2CCC(=C)C1C2)C)C</chem>    | BERGAMOTENE                   |
| <chem>CC1(C2CC3C1(C3C2)C)C</chem>           | TRICYCLENE                    |
| <chem>CC1=CCCC2(C1CC(CC2)C(C)(C)O)C</chem>  | A-EUDESOL                     |
| <chem>CC(=O)OC1CC2CCC1(C2(C)C)C</chem>      | BORNYL ACETATE                |
| <chem>CCCCCC(=O)C</chem>                    | 2-HEPTANONE                   |
| <chem>CC(C)C1CCC(C(C1)O)C(=C)C(C)C=C</chem> | 6-SHYOBUNOL                   |
| <chem>CC1(C2CCC1(C(=O)C2)C)C</chem>         | CAMPHOR                       |
| <chem>CC(=CCCC(=CC=O)C)C</chem>             | B-CITRAL                      |
| <chem>CC1=CC2C(CCC(C2CC1)(C)O)C(C)C</chem>  | A-CADINOL                     |
| <chem>CC1=CC=C(C=C1)C(C)C</chem>            | P-CYMENE                      |
| <chem>CC(C)C12CCC(=C)C1C2</chem>            | SABINENE                      |
| <chem>CC1CCC(C2=C1C=CC(=C2)C)C(C)C</chem>   | CALAMENENE                    |
| <chem>CC1CCC(C2C13C2C(=CC3)C)C(C)C</chem>   | CUBEBENE                      |
| <chem>CC1=CC=CC=C1</chem>                   | TOLUENE                       |
| <chem>CC1=CCC2C3C1C2(CCC3C(C)C)C</chem>     | B-YLANGENE                    |
| <chem>CC(CCC=C(C)C)CC=O</chem>              | CITRONELLAL                   |

|                                             |                       |
|---------------------------------------------|-----------------------|
| <chem>CCCCCCCCCCCC(=O)C</chem>              | 2-TRIDECANONE         |
| <chem>CCCCCCCC(=O)C</chem>                  | 2-NONANONE            |
| <chem>CC1CCC=C2C1(C3C(C3(C)C)CC2)C</chem>   | (+)-CALARENE          |
| <chem>CC1=C2CC(CCC2(CCC1)C)C(C)(C)O</chem>  | GAMA-EUDESOL          |
| <chem>CC(=CCCC(=CCCC(=O)C)C)C</chem>        | GERANYL ACETONE       |
| <chem>CC1CCC(C2C13C2C(=CC3)C)C(C)C</chem>   | A-CUBEBENE            |
| <chem>CCCCCC(C)O</chem>                     | 2-HEPTANOL            |
| <chem>CC1(C2CC=C(C1C2)C=O)C</chem>          | (-)-MYRTENAL          |
| <chem>CC1=CCC(=CC1)C(C)C</chem>             | GAMA-TERPINENE        |
| <chem>CC1=CCC2C(C1)C2(C)C</chem>            | 3-CARENE              |
| <chem>CC(=C)C1CCC(=C)CC1</chem>             | p-Mentha-1(7),8-diene |
| <chem>CC(=CCCC1=COC=C1)C</chem>             | PERILLEN              |
| <chem>CCCCCCCC(C)O</chem>                   | 2-NONANOL             |
| <chem>CC1(CC2C1CCC3(C(O3)CCC2=C)C)C</chem>  | CARYOPHYLLENE OXIDE   |
| <chem>CC1=CCC(C2=C1C=CC(=C2)C)C(C)C</chem>  | A-CALACORENE          |
| <chem>CC1=CC=C(CC1)C(=C)C</chem>            | 1,3,8-p-Menthatriene  |
| <chem>CC(=O)CCC1=CC(=C(C=C1)O)OC</chem>     | VANILLYLACETONE       |
| <chem>CCCCC=C(C)C</chem>                    | 2-METHYL-2-HEPTENE    |
| <chem>CC1=CCC(CC1)C(=C)CCC=C(C)C</chem>     | B-OCIMENE             |
| <chem>CCCCC</chem>                          | PENTANE               |
| <b>Pine essential oil</b>                   |                       |
| <chem>CC1(C2CCC(=C)C1C2)C</chem>            | B-PINENE              |
| <chem>CC1=CCC2CC1C2(C)C</chem>              | A-PINENE              |
| <chem>CC1=CCC(CC1)C(=C)C</chem>             | LIMONENE              |
| <chem>CC1=CC2C(CCC(=C2CC1)C)C(C)C</chem>    | (+)-DELTA-CADINENE    |
| <chem>CC1(C2CCC(C2)C1=C)C</chem>            | CAMPHENE              |
| <chem>CC1=CCC(CC1)C(C)(C)O</chem>           | A-TERPINEOL           |
| <chem>CC1=CCCC(=C)C2CC(C2CC1)(C)C</chem>    | B-CARYOPHYLLENE       |
| <chem>CC(=CCCC(=C)C=C)C</chem>              | MYRCENE               |
| <chem>CC1CCC(C2C13C2C(=CC3)C)C(C)C</chem>   | alpha-Cubebene        |
| <chem>CC(C)C1CCC(=C)C=C1</chem>             | B-PHELLANDRENE        |
| <chem>CC1=CC2C(CC1)C(=CCC2C(C)C)C</chem>    | A-MUUROLENE           |
| <chem>CC1=CCC(C=CCC(=CCC1)C)(C)C</chem>     | HUMULENE              |
| <chem>CC1=CCC(=C(C)C)CC1</chem>             | TERPINOLENE           |
| <chem>CC1=CCC2C(C1)C2(C)C</chem>            | 3-CARENE              |
| <chem>CC1=CCC(CC1)C(=C)CCC=C(C)C</chem>     | B-OCIMENE             |
| <chem>CC1CCC(C2C13C2C(=C)CC3)C(C)C</chem>   | beta-Cubebene         |
| <chem>CC1(C2CC3C1(C3C2)C)C</chem>           | TRICYCLENE            |
| <chem>CC1(C2CC1C(=C)C(C2)O)C</chem>         | TRANS-PINOCARVEOL     |
| <chem>CC(=O)OC1CC2CCC1(C2(C)C)C</chem>      | BORNYL ACETATE        |
| <chem>CC(=O)OC1C(C2CCC1(C2)C)(C)C</chem>    | Fenchyl Acetate       |
| <chem>CC1CCC2C13CCC(C(C3)C2(C)C)(C)O</chem> | CEDROL                |
| <chem>CC1(C2CCC1(C(=O)C2)C)C</chem>         | CAMPHOR               |

|                                             |                     |
|---------------------------------------------|---------------------|
| <chem>CC1(C2CCC1(C(C2)O)C)C</chem>          | BORNEOL             |
| <chem>CC1(C2CC=C(C1C2)CO)C</chem>           | MYRTENOL            |
| <chem>CC1(C2CC=C(C1C2)C=O)C</chem>          | MYRTENAL            |
| <chem>CC1(CCCC2(C3C1C(C2=C)CC3)C)C</chem>   | LONGIFOLENE         |
| <chem>CC(=C1CCC(C(C1)C(=C)C)(C)C=C)C</chem> | GAMA-ELEMENE        |
| <chem>CC1=CC2C(CCC(C2CC1)(C)O)C(C)C</chem>  | A-CADINOL           |
| <chem>CC1C2CC(C2(C)C)CC1=O</chem>           | 3-PINANONE          |
| <chem>CC1=CC=C(C=C1)C(C)C</chem>            | P-CYMENE            |
| <chem>CC1(CC2C1CCC3(C(O3)CCC2=C)C)C</chem>  | CARYOPHYLLENE OXIDE |
| <chem>CC(C)C1CCC2(C3C1C2C(=C)CC3)C</chem>   | B-YLANGENE          |
| <chem>CC1=CCC2C3C1C2(CCC3C(C)C)C</chem>     | COPAENE             |
| <chem>CC=CC1=CC(=C(C=C1)OC)OC</chem>        | METHYL ISOEUGENOL   |
| <chem>CC(C)C12CCC(=C)C1C2</chem>            | SABINENE            |
| <chem>CC1=CCC(=CC1)C(C)C</chem>             | GAMA-TERPINENE      |
| <chem>CC1CCC(C2C13C2C(=CC3)C)C(C)C</chem>   | A-CUBEBENE          |
| <chem>CC1(C2CCC(C2)(C1=O)C)C</chem>         | FENCHONE            |
| <chem>CCCCCC=O</chem>                       | HEXANAL             |
| <chem>CC1CC2C(C2(C)C)C=C1</chem>            | 4-CARENE            |
| <chem>CC1=CCC(C=C1)C(=C)C</chem>            | DIHYDRO P-CYMENE    |
| <chem>CC1=CCC(C1(C)C)CC=O</chem>            | A-CAMPHOLENAL       |
| <chem>CC(C)C1CCC2(C1C3C2CCC3=C)C</chem>     | B-BOURBONENE        |
| <chem>C1=CC=C(C=C1)CCO</chem>               | PHENETHYL ALCOHOL   |
| <chem>CCCCCC1=CC=CO1</chem>                 | 2-PENTYLFURAN       |
| <chem>CC1=CCC(C=C1)C(C)C</chem>             | A-PHELLANDRENE      |
| <chem>CC1=CCC2C3C1C2(CCC3C(C)C)C</chem>     | A-YLANGENE          |
| <chem>CC(=O)CCC1=CC=CC=C1</chem>            | 4-PHENYL-2-BUTANONE |
| <chem>C1=CC=C(C=C1)C=O</chem>               | BENZALDEHYDE        |
| <chem>CCCCCCCCC=O</chem>                    | NONANAL             |
| <chem>CCOC(=O)C1=CC=CC=C1C(=O)OCC</chem>    | DIETHYL PHTHALATE   |
| <b>Rose Damascus essential oil</b>          |                     |
| <chem>CC(CCC=C(C)C)CCO</chem>               | CITRONELLOL         |
| <chem>CC(=CCCC(=CCO)C)C</chem>              | GERANIOL            |
| <chem>CCCCCCCCCCCCCCCCCCCC</chem>           | NONADECANE          |
| <chem>CC(=CCCC(=CCO)C)C</chem>              | NEROL               |
| <chem>CCCCCCCCCCCCCCCCCCCC</chem>           | HENEICOSANE         |
| <chem>CCCCCCCCCCC=CCCCCCCCC</chem>          | 9-NONADECENE        |
| <chem>CCCCCCCCCCCCCCCCCCCC</chem>           | HEPTADECANE         |
| <chem>CC(=CCCC(=CCCC(=CCO)C)C)C</chem>      | FARNESOL            |
| <chem>COC1=C(C=CC(=C1)CC=C)O</chem>         | EUGENOL             |
| <chem>CC(=CCCC(C)(C=C)O)C</chem>            | LINALOOL            |
| <chem>C1=CC=C(C=C1)CCO</chem>               | PHENETHYL ALCOHOL   |
| <chem>CCCCCCCCCCCCCCCCCCCC</chem>           | HEXACOSANE          |
| <chem>CC(=CCCC(=CCOC(=O)C)C)C</chem>        | GERANYL ACETATE     |

|                                               |                                |
|-----------------------------------------------|--------------------------------|
| <chem>COC1=C(C=C(C=C1)CC=C)OC</chem>          | METHYLEUGENOL                  |
| <chem>CCCCCCCCCCCCCCCCCCCC</chem>             | EICOSANE                       |
| <chem>CC(=CCCC(=CC=O)C)C</chem>               | CITRAL                         |
| <chem>CC1=CCC2CC1C2(C)C</chem>                | A-PINENE                       |
| <chem>CC(=CCCC(=CC=O)C)C</chem>               | B-CITRAL                       |
| <chem>CC(CCC=C(C)C)CCOC(=O)C</chem>           | CITRONELLYL ACETATE            |
| <chem>CC1=CCC(CC1)C(C)(C)O</chem>             | A-TERPINEOL                    |
| <chem>CC1CCOC(C1)C=C(C)C</chem>               | ROSE OXIDE                     |
| <chem>CC1CCC(CC2=C1CCC2C)C(=C)C</chem>        | A-GUAIENE                      |
| <chem>CC(=CCCC(=C)C=C)C</chem>                | MYRCENE                        |
| <chem>CC1=CCC(C=CCC(=CCC1)C)(C)C</chem>       | HUMULENE                       |
| <chem>CC1CCC2=C(CCC(CC12)C(=C)C)C</chem>      | A-BULNESENE                    |
| <chem>CCCCCCCCCCCCCCCCCC</chem>               | OCTADECANE                     |
| <chem>CCCCCCCCCCCCCCCC</chem>                 | PENTADECANE                    |
| <chem>CC(=O)OCCC1=CC=CC=C1</chem>             | PHENETHYL ACETATE              |
| <chem>CCCCCCCCCCCCCCCCCCCCCCCCCCCCCCCC</chem> | OCTACOSANE                     |
| <chem>CCCCCCCCCC=CCCCCCCC</chem>              | 8-HEPTADECENE                  |
| <chem>CCCCCCCCCC=CCCCCCCCCC</chem>            | 10-HENEICOSENE                 |
| <chem>CC1(C2CCC(=C)C1C2)C</chem>              | B-PINENE                       |
| <chem>CCCCCCCCCC=CCCCCCCCCC</chem>            | 9-EICOSENE                     |
| <chem>CC(=CCCC(=CCCC(C)(C=C)O)C)C</chem>      | NEROLIDOL                      |
| <chem>CCCCCCC=O</chem>                        | HEPTANAL                       |
| <chem>CCCCCCO</chem>                          | HEXANOL                        |
| <chem>CC(=CCCC(=CCC=C(C)C=C)C)C</chem>        | A-FARNESENE                    |
| <chem>CCCCCCCCCCCCCCCCCC</chem>               | HEXADECANE                     |
| <chem>CC12CCCC(=C)C1CC(CC2)C(C)(C)O</chem>    | B-EUDESOL                      |
| <chem>CC(=CCCC(=CCCC(=CC=O)C)C)C</chem>       | FARNESAL                       |
| <chem>CC1=CCCC2(C1CC(CC2)C(C)(C)O)C</chem>    | A-EUDESOL                      |
| <chem>CC(C)C1CCC2(C1C3C2CCC3=C)C</chem>       | B-BOURBONENE                   |
| <chem>C1=CC=C(C=C1)C=O</chem>                 | BENZALDEHYDE                   |
| <chem>C1=CC=C(C=C1)COC(=O)C2=CC=CC=C2</chem>  | BENZYL BENZOATE                |
| <chem>CC1=CCC(=CC1)C(C)C</chem>               | GAMA-TERPINENE                 |
| <chem>C1=CC=C(C=C1)CCOC(=O)C2=CC=CC=C2</chem> | PHENETHYL BENZOATE             |
| <chem>CC1=CCOC(C1)C=C(C)C</chem>              | NEROL OXIDE                    |
| <chem>CCCCCCCCCC=O</chem>                     | NONANAL                        |
| <chem>CC1=CCC(CC1)C(=C)C</chem>               | D-LIMONENE                     |
| <chem>CC1=CCC(CC1)C(=C)C</chem>               | L-LIMONENE                     |
| <chem>CC(=CCC=C(C)C=C)C</chem>                | B-OCIMENE                      |
| <chem>CCC(C)CO</chem>                         | 2-METHYL-1-BUTANOL             |
| <chem>CCCCCCCCCCCCCCCCCC=C</chem>             | 1-NONADECENE                   |
| <chem>CCCCC=O</chem>                          | PENTANAL                       |
| <chem>CCC(C)C(=O)OCCC1=CC=CC=C1</chem>        | 2-PHENYLETHYL 2-METHYLBUTYRATE |

|                                             |                         |
|---------------------------------------------|-------------------------|
| <chem>CC1=CCC(=C(C)C)CC1</chem>             | TERPINOLENE             |
| <chem>CC1(CC2C1CCC3(C(O3)CCC2=C)C)C</chem>  | CARYOPHYLLENE OXIDE     |
| <chem>CC(C)C12CCC(=C)C1C2</chem>            | SABINENE                |
| <chem>CC1CC2C(C2(C)C)C=C1</chem>            | 4-CARENE                |
| <chem>CC(CCC=C(C)C)CCOC=O</chem>            | CITRONELLYL FORMATE     |
| <chem>CC1(C2CCC(O1)(CC2)C)C</chem>          | EUCALYPTOL              |
| <chem>CCC=CCCO</chem>                       | LEAF ALCOHOL            |
| <chem>CC1=CC=C(C=C1)C(C)C</chem>            | P-CYMENE                |
| <chem>CC(=CCCC(=O)C)C</chem>                | 6-METHYL-5-HEPTEN-2-ONE |
| <chem>CC(=CCC=C(C)C=C)C</chem>              | TRANS-B-OCIMENE         |
| <chem>CC1(CCC(O1)C(C)(C)O)C=C</chem>        | LINALOOL OXIDE          |
| <chem>CCCCCCO</chem>                        | 1-PENTANOL              |
| <chem>CCCCCC=O</chem>                       | HEXANAL                 |
| <chem>CC(C)CCCC(C)CCO</chem>                | 3,7-DIMETHYL-1-OCTANOL  |
| <chem>C1=CC=C(C=C1)CO</chem>                | BENZYL ALCOHOL          |
| <chem>CCCCCCCCO</chem>                      | HEPTANOL                |
| <chem>CC(CCC=C(C)C)CC=O</chem>              | CITRONELLAL             |
| <chem>CC1=CCC(C=C1)C(C)C</chem>             | A-PHELLANDRENE          |
| <chem>CCCCCCCCC=O</chem>                    | OCTANAL                 |
| <chem>CCCCCCCCCCCCC</chem>                  | TRIDECANE               |
| <chem>CCCCCCCCCO</chem>                     | OCTANOL                 |
| <chem>CC1(C2CCC(C2)C1=C)C</chem>            | CAMPHENE                |
| <chem>CCCCCCCCC</chem>                      | OCTANE                  |
| <chem>CCC(C)O</chem>                        | 2-BUTANOL               |
| <chem>CCCCCCCCCCC</chem>                    | DECANE                  |
| <chem>CCCC=O</chem>                         | BUTANAL                 |
| <b>Clary Sage essential oil</b>             |                         |
| <chem>CC(=CCCC(C)(C=C)OC(=O)C)C</chem>      | LINALYL ACETATE         |
| <chem>CC(=CCCC(C)(C=C)O)C</chem>            | LINALOOL                |
| <chem>CC1=CCC2(CCCC(C23C1C3))(C)C)C</chem>  | CIS-THUJOPSENE          |
| <chem>CC1=CCCC(=C)C2CC(C2CC1)(C)C</chem>    | B-CARYOPHYLLENE         |
| <chem>CC1CCC2C13CC=C(C(C3)C2(C)C)C</chem>   | (-)-ALPHA-CEDRENE       |
| <chem>CC1=CCC(CC1)C(C)(C)O</chem>           | A-TERPINEOL             |
| <chem>CC(=CCCC(=CCOC(=O)C)C)C</chem>        | GERANYL ACETATE         |
| <chem>CC1CCC(C2C13C2C(=CC3)C)C(C)C</chem>   | Alpha-Cubebene          |
| <chem>CC1CCC(C2C13C2C(=C)CC3)C(C)C</chem>   | Beta-Cubebene           |
| <chem>CC1CCC2C13CCC(C(C3)C2(C)C)(C)O</chem> | CEDROL                  |
| <chem>CC(=CCCC(=CCOC(=O)C)C)C</chem>        | NERYL ACETATE           |
| <chem>CC(=CCC/C(=C/CO)/C)C</chem>           | GERANIOL                |
| <chem>CC1=CCC2C3C1C2(CCC3C(C)C)C</chem>     | A-COPAENE               |
| <chem>CC1=CCC(CC1)C(=C)C</chem>             | LIMONENE                |

|                                                      |                     |
|------------------------------------------------------|---------------------|
| <chem>CC1(CC2C1CCC3(C(O3)CCC2=C)C)C</chem>           | CARYOPHYLLENE OXIDE |
| <chem>CC1(CCCC2(C1CCC(C2CCC(C)(C=C)O)(C)O)C)C</chem> | SCLAREOL            |
| <chem>CC(=C)CCCC(=C)C=C</chem>                       | alpha.-Myrcene      |
| <chem>CC(=CCCC(=C)C=C)C</chem>                       | Beta-Myrcene        |
| <chem>CC(=CCCC(=CCO)C)C</chem>                       | NEROL               |
| <chem>CC1(C2CCC1(C(=O)C2)C)C</chem>                  | CAMPHOR             |
| <chem>CC1=CCC2CC1C2(C)C</chem>                       | A-PINENE            |
| <chem>CC(=CCC=C(C)C=C)C</chem>                       | B-OCIMENE           |
| <chem>CC1=CCC(C=CCC(=CCC1)C)(C)C</chem>              | HUMULENE            |
| <chem>CC1(C2CCC(O1)(CC2)C)C</chem>                   | EUCALYPTOL          |
| <chem>CC(C)C1CCC2(C1C3C2CCC3=C)C</chem>              | (-)-B-BOURBONENE    |
| <chem>CC1(C2C1C3C(CCC3(C)O)C(=C)CC2)C</chem>         | SPATHULENOL         |
| <chem>CCCCCCC(C)C</chem>                             | 2-METHYLOCTANE      |
| <chem>CC1=CC=C(C=C1)C2(CCCC2(C)C)C</chem>            | (+)CUPARENE         |
| <chem>CC1(C2CCC1(C(C2)O)C)C</chem>                   | ENDO-BORNEOL        |
| <chem>CC1(C2CCC(=C)C1C2)C</chem>                     | B-PINENE            |
| <chem>CC(=CCC=C(C)C=C)C</chem>                       | TRANS-B-OCIMENE     |
| <chem>CC1(CCCC2(C1=CCC(CC2)(C)O)C)C</chem>           | WIDDROL             |
| <chem>CC1(CCC(O1)C(C)(C)O)C=C</chem>                 | LINALOOL OXIDE      |
| <chem>CC1=CCC2C3(CCCC(C3CCC2(O1)C)(C)C)C</chem>      | SCLAREOLOXIDE       |
| <chem>CC1(CC2C1CCC3(C(O3)CCC2=C)C)C</chem>           | CARYOPHYLLENE OXIDE |
| <chem>CC1(CCC(O1)C(C)(C)O)C=C</chem>                 | LINALOOL OXIDE      |
| <chem>CC(=CCCC(=CCC=C(C)C=C)C)C</chem>               | A-FARNESENE         |
| <chem>CCC=CCCO</chem>                                | LEAF ALCOHOL        |
| <chem>CCCCCCC=O</chem>                               | HEPTANAL            |
| <chem>CC1=CCC(=C(C)C)CC1</chem>                      | TERPINOLENE         |
| <chem>CCCCCOC=O</chem>                               | HEXYL FORMATE       |
| <chem>CCCC=CCO</chem>                                | TRANS-2-HEXENOL     |
| <chem>CC1=CC=C(C=C1)C(C)C</chem>                     | P-CYMENE            |
| <chem>CC(C)C1CCC(=C)C=C1</chem>                      | B-PHELLANDRENE      |
| <chem>CC1(C2CCC(C2)C1=C)C</chem>                     | COMPHENE            |

b. LigandScout result

| <b>Screening Results:</b>                            |                      |
|------------------------------------------------------|----------------------|
| <chem>CC(=O)CCC1=CC(=C(C=C1)O)OC</chem>              | VANILLYLACETONE      |
| <chem>CCCC(CC(=O)CCC1=CC(=C(C=C1)O)OC)O</chem>       | (4)-Gingerol         |
| <chem>CCCCCC=CC(=O)CCC1=CC(=C(C=C1)O)OC</chem>       | 6-Shogaol            |
| <chem>CCCCCC(CC(=O)CCC1=CC(=C(C=C1)O)OC)O</chem>     | 6-Gingerol           |
| <chem>CCCCCCCC(CC(=O)CCC1=CC(=C(C=C1)O)OC)O</chem>   | (8)-Gingerol         |
| <chem>CCOC(=O)C1=CC=CC=C1C(=O)OCC</chem>             | DIETHYL<br>PHTHALATE |
| <chem>CCCCCCCCCC(CC(=O)CCC1=CC(=C(C=C1)O)OC)O</chem> | (10)-Gingerol        |
| <chem>CC1(CCCC2(C1CCC(C2CCC(C)(C=C)O)(C)O)C)C</chem> | SCLAREOL             |



|                                      |                                |
|--------------------------------------|--------------------------------|
| <chem>CC1=C(C=CC(=C1)C(=O)C)O</chem> | 4-Hydroxy-3-methylacetophenone |
| <chem>CC1(CCC(O1)C(C)(C)O)C=C</chem> | LINALOOL OXIDE                 |
| <chem>CC=CC1=CC(=C(C=C1)OC)OC</chem> | METHYL ISOEUGENOL              |
| <chem>COC1=C(C=CC(=C1)CC=C)O</chem>  | EUGENOL                        |
| <chem>COC1=C(C=C(C=C1)CC=C)OC</chem> | METHYLEUGENOL                  |

**Table S5.** Prediction result of deep learning

a. Deep learning prediction result

| SMILES                                    | Prediction score (max = 0) | Molecule                    |
|-------------------------------------------|----------------------------|-----------------------------|
| <chem>Cc1ccc(cc1)C(O)(C)C</chem>          | 0.008643875                | GERANIOL+8-HYDROXY-P-CYMENE |
| <chem>C=CC(CCCC(O)(C)C)C</chem>           | 0.002009252                | DIHYDROMYRCENOL             |
| <chem>CCC(O)C</chem>                      | 0.002073357                | 2-BUTANOL                   |
| <chem>OCCC(CCCC(C)C)C</chem>              | 0.000890598                | 3,7-DIMETHYL-1-OCTANOL      |
| <chem>C=CC(OC(=O)C)(CCC=C(C)C)C</chem>    | 0.017367085                | LINALYL ACETATE             |
| <chem>CCC(CO)C</chem>                     | 0.00209589                 | 2-METHYL-1-BUTANOL          |
| <chem>COc1cc(C)ccc1C(C)C</chem>           | 0.01343793                 | METHYLTHYMOL                |
| <chem>C=CC(CCC=C(C)C)(O)C</chem>          | 0.011044887                | LINALOOL                    |
| <chem>OCCC(CC)C</chem>                    | 0.002113451                | 1-Pentanol, 3-methyl-       |
| <chem>OCCC(CCC=C(C)C)C</chem>             | 0.004184846                | CITRONELLOL                 |
| <chem>CC(CCC=C(C)C)CCOC(=O)C</chem>       | 0.009150817                | CITRONELLYL ACETATE         |
| <chem>CC(=CCCC(c1ccc(cc1)C)C)C</chem>     | 0.029458433                | A-CURCUMENE                 |
| <chem>CC(C1CC=C(c2c1cc(C)cc2)C)C</chem>   | 0.025302203                | A-CALACORENE                |
| <chem>OCc1ccc(cc1)C(C)C</chem>            | 0.026568791                | P-CYMEN-7-OL                |
| <chem>Cc1ccc(cc1)C(C)C</chem>             | 0.03990693                 | P-CYMENE                    |
| <chem>CCC(=O)OC(CCC=C(C)C)(C=C)C</chem>   | 0.034996018                | LINALYL PROPIONATE          |
| <chem>CC=C(C(=O)OCCC(CCC=C(C)C)C)C</chem> | 0.012789104                | CITRONELLYL TIGLATE         |
| <chem>C=CC(CCC=C(CCC=C(C)C)C)(O)C</chem>  | 0.01516746                 | NEROLIDOL                   |
| <chem>Cc1ccc(c(c1)O)C(C)C</chem>          | 0.038171202                | THYMOL                      |
| <chem>CCCCCCC(C)C</chem>                  | 0.001651392                | 2-METHYLOCTANE              |
| <chem>CCCCCC(O)C</chem>                   | 0.001959076                | 2-HEPTANOL                  |
| <chem>O=CCC(CCC=C(C)C)C</chem>            | 0.017464662                | CITRONELLAL                 |
| <chem>Cc1cc(C)c(c(c1)O)C</chem>           | 0.048647635                | 2,3,5,6-TETRAMETHYL PHENOL  |
| <chem>O=COCCC(CCC=C(C)C)C</chem>          | 0.01350342                 | CITRONELLYL FORMATE         |

|                                                 |             |                                |
|-------------------------------------------------|-------------|--------------------------------|
| <chem>CCCCC(CC)O</chem>                         | 0.001825806 | 3-OCTANOL                      |
| <chem>CC(=CCOC(=O)C)CCC=C(C)C</chem>            | 0.045709711 | NERYL ACETATE                  |
| <chem>OCC=C(CCC=C(C)C)C</chem>                  | 0.023227636 | NEROL                          |
| <chem>CCCCCCCC(O)C</chem>                       | 0.001822409 | 2-NONANOL                      |
| <chem>CCCCC=C(C)C</chem>                        | 0.014632422 | 2-METHYL-2-HEPTENE             |
| <chem>CC=C(C(=O)OCC=C(CCC=C(C)C)C)C</chem>      | 0.054050189 | GERANYL TIGLATE                |
| <chem>C=CC1(C)CCC(O1)C(O)(C)C</chem>            | 0.007967635 | LINALOOL OXIDE                 |
| <chem>OCC=C(CCC=C(CCC=C(C)C)C)C</chem>          | 0.026609171 | FARNESOL                       |
| <chem>O=Cc1ccc(cc1)C(C)C</chem>                 | 0.231102541 | CUMINAL                        |
| <chem>CC(C1CCC(c2c1cc(C)cc2)C)C</chem>          | 0.035699572 | CALAMENENE                     |
| <chem>CC(=O)CCC=C(C)C</chem>                    | 0.060619555 | 6-METHYL-5-HEPTEN-2-ONE        |
| <chem>Cc1ccc(cc1)C1(C)CCCC1(C)C</chem>          | 0.108623639 | (+)CUPARENE                    |
| <chem>CCCC(=O)OCCC(CCC=C(C)C)C</chem>           | 0.018891722 | CITRONELLYL BUTYRATE           |
| <chem>CC(=CCCC(=O)C)CCC=C(C)C</chem>            | 0.05185625  | GERANYL ACETONE                |
| <chem>CCCC=C(C(=O)C)C</chem>                    | 0.116623253 | METHYL HEPTENONE               |
| <chem>O=CC=C(CCC=C(C)C)C</chem>                 | 0.139957607 | CITRAL                         |
| <chem>O=CC=C(CCC=C(CCC=C(C)C)C)C</chem>         | 0.093734406 | FARNESAL                       |
| <chem>CC=Cc1ccc(c(c1)OC)OC</chem>               | 0.136565506 | METHYL ISOEUGENOL              |
| <chem>C=CC1(C)CCC(C(C1C(=C)C)O)C(C)C</chem>     | 0.011093457 | 6-SHYOBUNOL                    |
| <chem>CC(C(=O)O)CC</chem>                       | 0.130108878 | METHYL 2-METHYLBUTYRATE        |
| <chem>CCCCC(C=C)O</chem>                        | 0.009655901 | 1-Octen-3-ol                   |
| <chem>CC(=CC=CC(=O)C)C</chem>                   | 0.414595753 | 6-METHYL-3,5-HEPTADIEN-2-ONE   |
| <chem>CCC(C(=O)OCCc1cccc1)C</chem>              | 0.33822456  | 2-PHENYLETHYL 2-METHYLBUTYRATE |
| <chem>CCC(=O)OCC=C(CCC=C(C)C)C</chem>           | 0.101425946 | NERYL PROPIONATE               |
| <chem>C=CC(=CCC=C(CCC=C(C)C)C)C</chem>          | 0.171454579 | A-FARNESENE                    |
| <chem>CCCC(CC(=O)CCc1ccc(c(c1)O)O)O</chem>      | 0.069810294 | (4)-Gingerol                   |
| <chem>CCCCC</chem>                              | 0.008540599 | PENTANE                        |
| <chem>C=CC(=CCC=C(C)C)C</chem>                  | 0.30781278  | TRANS-B-OCIMENE                |
| <chem>CC(=CCCC(C1CC=C(C=C1)C)C)C</chem>         | 0.03706352  | 1-Zingiberene                  |
| <chem>CCCCC(CC(=O)CCc1ccc(c(c1)OC)O)O</chem>    | 0.044022541 | 6-Gingerol                     |
| <chem>C=CCc1ccc(c(c1)OC)OC</chem>               | 0.192272097 | METHYLEUGENOL                  |
| <chem>CCCCCO</chem>                             | 0.006227626 | 1-PENTANOL                     |
| <chem>CCCCCCCC(CC(=O)CCc1ccc(c(c1)OC)O)O</chem> | 0.030155448 | (8)-Gingerol                   |
| <chem>O=CCC1CC=C(C1(C)C)C</chem>                | 0.129566833 | A-CAMPHOLENAL                  |
| <chem>CCCC(=O)OCC=C(CCC=C(C)C)C</chem>          | 0.100294523 | GERANYL BUTYRATE               |

|                                                 |             |                                     |
|-------------------------------------------------|-------------|-------------------------------------|
| <chem>CCCCCCCCC(CC(=O)CCc1cc(c(c1)OC)O)O</chem> | 0.022273788 | (10)-Gingerol                       |
| <chem>CCCCCCO</chem>                            | 0.005009609 | HEXANOL                             |
| <chem>CC(=O)OCCc1cccc1</chem>                   | 0.482536584 | PHENETHYL ACETATE                   |
| <chem>CC=C(C(=O)OCCc1cccc1)C</chem>             | 0.390719265 | 2-Phenylethyl tiglate               |
| <chem>CCCCCCCO</chem>                           | 0.004298539 | HEPTANOL                            |
| <chem>OCc1cccc1</chem>                          | 0.419901103 | BENZYL ALCOHOL                      |
| <chem>CCCCCCCC</chem>                           | 0.004357493 | OCTANE                              |
| <chem>CC1=CCC(C=C1)C(C)C</chem>                 | 0.045506459 | DIHYDRO P-CYMENE                    |
| <chem>CCCCCCCCO</chem>                          | 0.003805185 | OCTANOL                             |
| <chem>CC(=CCCC(C1(O)CCC(=CC1)C)C)C</chem>       | 0.036208939 | B-BISABOLOL                         |
| <chem>CCCCCC(=O)C</chem>                        | 0.027355941 | 2-HEPTANONE                         |
| <chem>CCCCCCCCC</chem>                          | 0.003501763 | DECANE                              |
| <chem>CC(=O)OC1C2(C)CCC(C1(C)C)C2</chem>        | 0.060283914 |                                     |
| <chem>CC(=CC1OCC=C(C1)C)C</chem>                | 0.059980094 | NEROL OXIDE                         |
| <chem>Cc1ccc(cc1)C(=O)C</chem>                  | 0.607619047 | P-METHYLACETOPHENONE                |
| <chem>OCCc1cccc1</chem>                         | 0.469033599 | PHENETHYL ALCOHOL                   |
| <chem>CCCCCCCC(=O)C</chem>                      | 0.015096921 | 2-NONANONE                          |
| <chem>CCCCCCCCCCCC</chem>                       | 0.002867836 | TRIDECANE                           |
| <chem>CCOC(=O)c1cccc1C(=O)OCC</chem>            | 0.301276624 | DIETHYL PHTHALATE                   |
| <chem>CCCC=CCO</chem>                           | 0.07663592  | TRANS-2-HEXENOL                     |
| <chem>CCCCCCCCCCCCCCCC</chem>                   | 0.002627785 | PENTADECANE                         |
| <chem>CCCCCCCCCCCC(=O)C</chem>                  | 0.010120729 | METHYL NONYL KETONE                 |
| <chem>Cc1cccc1</chem>                           | 0.702145159 | TOLUENE                             |
| <chem>CCCCCCCCCCCCCCCC</chem>                   | 0.002536088 | HEXADECANE                          |
| <chem>CC(=O)c1cccc1</chem>                      | 0.739649415 | ACETOPHENONE                        |
| <chem>COc1cc(CCC(=O)C)ccc1O</chem>              | 0.323977649 | VANILLYLACETONE                     |
| <chem>CCCCCCCCCCCCCCCC</chem>                   | 0.00245933  | HEPTADECANE                         |
| <chem>OCCC=CCC</chem>                           | 0.086930223 | LEAF<br>ALCOHOLCC1=CCC(CC1)(C(C)C)O |
| <chem>CCCCCCCCCCCC(=O)C</chem>                  | 0.007674633 | 2-TRIDECANONE                       |
| <chem>CCCCCCCCCCCCCCCC</chem>                   | 0.002393398 | OCTADECANE                          |
| <chem>CCCCCCCCCCCCCCCC</chem>                   | 0.002335916 | NONADECANE                          |
| <chem>CC(=O)CCc1cccc1</chem>                    | 0.66228646  | 4-PHENYL-2-BUTANONE                 |
| <chem>CC(=CCc1ccc1)C</chem>                     | 0.704966903 | PERILLEN                            |
| <chem>CCCCCCCCCCCCCCCCC</chem>                  | 0.002285411 | EICOSANE                            |
| <chem>CCCCCCCCCCCCCCCCC</chem>                  | 0.002240672 | HENEICOSANE                         |
| <chem>CC(=O)c1ccc(c(c1)C)O</chem>               | 0.529192209 | 4-Hydroxy-3-methylacetophenone      |
| <chem>CCCCCCCCCCCCCCCCC</chem>                  | 0.002076595 | HEXACOSANE                          |
| <chem>CCCCCCCCCCCCCCCCC</chem>                  | 0.002029751 | OCTACOSANE                          |

|                                                      |             |                                                                            |
|------------------------------------------------------|-------------|----------------------------------------------------------------------------|
| <chem>CC(=O)OC1(C)CCCC(C1=O)(C)C</chem>              | 0.585897207 |                                                                            |
| <chem>CC1=CC(=O)CC(C1)(C)C</chem>                    | 0.294976711 | ISOPHORONE                                                                 |
| <chem>C=CC1(C)CCC(CC1C(=C)C)C(O)(C)C</chem>          | 0.165854439 | ELEMOL                                                                     |
| <chem>CCCCCCCCC=CCCCCCCC</chem>                      | 0.00929959  | 8-HEPTADECENE                                                              |
| <chem>CCCCCCCCC=CCCCCCCCC</chem>                     | 0.007661625 | 9-NONADECENE                                                               |
| <chem>CCCCCCCCC=CCCCCCC</chem>                       | 0.007051314 | 9-EICOSENE                                                                 |
| <chem>CCCCCCCCC=CCCCCCC</chem>                       | 0.006543405 | 10-HENEICOSENE                                                             |
| <chem>CC(=O)OC1CC2C(C1(C)CC2)(C)C</chem>             | 0.125596374 | BORNYL ACETATE                                                             |
| <chem>CC1=CC[C@@H](CC1)C(O)(C)C</chem>               | 0.083480217 |                                                                            |
| <chem>CCCCCOC=O</chem>                               | 0.031293157 | HEXYL FORMATE                                                              |
| <chem>CC(C1CCC(=C)C=C1)CCC=C(C)C</chem>              | 0.174899444 | B-sesquiphellandrene                                                       |
| <chem>CCCCCC=CC(=O)C</chem>                          | 0.197580278 | trans-3-Nonen-2-one                                                        |
| <chem>C=CCc1ccc(c(c1)OC)O</chem>                     | 0.50748986  | EUGENOL                                                                    |
| <chem>CC1=CCC(=CC1)C(C)C</chem>                      | 0.213542834 | GAMA-TERPINENE                                                             |
| <chem>CCCCCCCCCCCCCCCCC=C</chem>                     | 0.004797086 | 1-NONADECENE                                                               |
| <chem>O=C(c1ccccc1)OCc1ccccc1</chem>                 | 0.805855095 | BENZYL BENZOATE                                                            |
| <chem>CC1CCOC(C1)C=C(C)C</chem>                      | 0.028964968 | ROSE OXIDE                                                                 |
| <chem>CC1CCC(C(C1)O)C(C)C</chem>                     | 0.007774258 | ISOMENTHOL                                                                 |
| <chem>CCCCCCCCC=O</chem>                             | 0.014482718 | DECANAL                                                                    |
| <chem>CCCCCCCCC=O</chem>                             | 0.018395383 | NONANAL                                                                    |
| <chem>C=CC(=C)CCC=C(C)C</chem>                       | 0.616398215 |                                                                            |
| <chem>CCCCCCCC=O</chem>                              | 0.024756061 | OCTANAL                                                                    |
| <chem>C=CC1(C)CCCC(O1)(C)C</chem>                    | 0.084495634 | LIMTOL                                                                     |
| <chem>CCCCCCC=O</chem>                               | 0.036211517 | HEPTANAL                                                                   |
| <chem>O=C(c1ccccc1)OCCc1ccccc1</chem>                | 0.80821234  | PHENETHYL BENZOATE                                                         |
| <chem>CCCCCC=O</chem>                                | 0.059204407 | HEXANAL                                                                    |
| <chem>CCCC=O</chem>                                  | 0.230770826 | BUTANAL                                                                    |
| <chem>CCCCC=O</chem>                                 | 0.107217938 | PENTANAL                                                                   |
| <chem>CC(=O)OC(C1CCC(C2=C(C1)C(C)CC2)C)(C)C</chem>   | 0.182576224 | A-TERPINEOL+GUAIYL ACETATE                                                 |
| <chem>OC1C2(C)CCC(C1(C)C)C2</chem>                   | 0.038045641 | Bicyclo[3.1.1]heptan-3-one, 2,6,6-trimethyl-, (1.alpha.,2.beta.,5.alpha.)- |
| <chem>CCCCC(=O)CC</chem>                             | 0.067102708 | 3-OCTANONE                                                                 |
| <chem>CC1=CCC(C=C1)C(=C)C</chem>                     | 0.421439707 | DIHYDRO P-CYMENE                                                           |
| <chem>C=CC(CCC1C(C)(O)CCC2C1(C)CCCC2(C)C)(O)C</chem> | 0.098436795 | SCLAREOL                                                                   |
| <chem>O=Cc1ccccc1</chem>                             | 0.950688064 | BENZALDEHYDE                                                               |
| <chem>C=CC1(C)CCC(=C(C)C)CC1C</chem>                 | 0.550105691 | GAMA-ELEMENE                                                               |

|                                                       |             |                              |
|-------------------------------------------------------|-------------|------------------------------|
| <chem>=C)C</chem>                                     |             |                              |
| <chem>CC1=CC(=O)C2CC1C2(C)C</chem>                    | 0.509539425 | VERBENONE                    |
| <chem>CCCCC=CC(=O)CCc1ccc(c(c1)OC)O</chem>            | 0.486877888 | 6-Shogaol                    |
| <chem>CC1C=CC2C(C1)C2(C)C</chem>                      | 0.048436388 | 4-CARENE                     |
| <chem>CC(C1CCC(=C)C=C1)C</chem>                       | 0.430848837 | B-PHELLANDRENE               |
| <chem>CC(=O)OCC1=CCC2CC1C2(C)C</chem>                 | 0.475699037 | MYRTENYL ACETATE             |
| <chem>OC1CC2C(C1(C)CC2)(C)C</chem>                    | 0.111609176 | BORNEOL                      |
| <chem>CC1(C)C2CCC1(C)C=C2</chem>                      | 0.217282549 | 2-BORNENE                    |
| <chem>CCCCC1CCCCO1</chem>                             | 0.727123737 | 2-PENTYLFURAN                |
| <chem>CC1=CCC(CC1)C(C)C</chem>                        | 0.172558561 | MENTHENE                     |
| <chem>CC1CCC(C(C1)O)C(=C)C</chem>                     | 0.052114975 | ISOPULEGOL                   |
| <chem>C=CC(=C)CCCC(=C)C</chem>                        | 0.619332373 | MYRCENE                      |
| <chem>CC1=CC2C(CC1)C(=CCC2C(C)C)C</chem>              | 0.082197197 | A-MUUROLENE                  |
| <chem>CC1=CCC(C)(C)C=CCC(=CCC1)C</chem>               | 0.485965103 | HUMULENE                     |
| <chem>CC1=CC2C(=C(C)CCC2C(C)C)CC1</chem>              | 0.120458908 |                              |
| <chem>ON=C1CC(C)CC(C1)(C)C</chem>                     | 0.372406363 | 2,2,6-TRIMETHYLCYCLOHEXANONE |
| <chem>CC1=CC2C(CC1)C(C)(O)CCC2C(C)C</chem>            | 0.057884987 | A-CADINOL                    |
| <chem>CC(=CCCC(=C)C1CCC(=CC1)C)C</chem>               | 0.552127719 | B-OCIMENE                    |
| <chem>CC1=CCC(=C(C)C)CC1</chem>                       | 0.608692169 | TERPINOLENE                  |
| <chem>C=C1C(O)CC2CC1C2(C)C</chem>                     | 0.213927448 | TRANS-PINOCARVEOL            |
| <chem>CC1CCC(C(=O)C1)C(C)C</chem>                     | 0.322236359 | MENTHONE                     |
| <chem>C=C[C@]1(C)CC[C@H](C[C@@H]1C(=C)C)C(=C)C</chem> | 0.717864037 | B-ELEMENE                    |
| <chem>CC1=CCC2CC1C2(C)C</chem>                        | 0.457652032 | A-PINENE                     |
| <chem>CC1=CC=C(CC1)C(=C)C</chem>                      | 0.854401529 | 1,3,8-p-Menthatriene         |
| <chem>OCC1=CCC2CC1C2(C)C</chem>                       | 0.438805223 | MYRTENOL                     |
| <chem>CC1=CCCC2(C1CC(CC2)C(O)C)C</chem>               | 0.332029194 | A-EUDESOL                    |
| <chem>CC1=CCC2C(C1)C2(C)C</chem>                      | 0.481720418 | 3-CARENE                     |
| <chem>CC1CCCC2=CCC3C(C12)C3(C)C</chem>                | 0.358923465 | ARISTOLENE                   |
| <chem>CC(=CCCC1(C)C2CCC(=C)C1C2)C</chem>              | 0.609347165 | BERGAMOTENE                  |
| <chem>CC1=C2CC(CCC2(CCC1)C)C(O)C</chem>               | 0.456567317 | GAMA-EUDESOL                 |
| <chem>CC1CCC=C2C1(C)C1C(C1(C)C)CC2</chem>             | 0.408815265 | (+)-CALARENE                 |
| <chem>CC1(O)CC=C2C(CC1)(C)CCC2(C)C</chem>             | 0.353506804 | WIDDROL                      |

|                                                 |             |                     |
|-------------------------------------------------|-------------|---------------------|
| <chem>CC(C1CCC2(C3C1C2C(=CC3)C)C)C</chem>       | 0.124494724 | A-YLANGENE          |
| <chem>CC(=C)C1CC=C(C(=O)C1)C</chem>             | 0.894299507 | CARVONE             |
| <chem>CC(C1CCC(C23C1C2C(=CC3)C)C)C</chem>       | 0.117594391 | CUBEBENE            |
| <chem>O=CC1=CCC2CC1C2(C)C</chem>                | 0.854127228 | MYRTENAL            |
| <chem>CC1=CC2C(CC1)C(=C)CCC2C(C)C</chem>        | 0.295259088 | GAMA-MUUROLENE      |
| <chem>O=C1CC2CC(C1C)C2(C)C</chem>               | 0.76543057  | 3-PINANONE          |
| <chem>CC(=C)C1CCC(CC1)(C)O</chem>               | 0.303873539 | P-MENTH-8-EN-1-OL   |
| <chem>CC1CCC2C1C1C(C1(C)C)CCC2(C)O</chem>       | 0.113247775 | GLOBULOL            |
| <chem>C=C1CCC2C(C3C1CCC3(C)O)C2(C)C</chem>      | 0.281699359 | SPATHULENOL         |
| <chem>CC12CCC(CC1)C(O2)(C)C</chem>              | 0.333440602 | EUCALYPTOL          |
| <chem>C=C1CCCC2(C1CC(CC2)C(O)(C)C)C</chem>      | 0.61417973  | B-EUDESOL           |
| <chem>CC1=CCC(CC1)C(=C)C</chem>                 | 0.81270206  | LIMONENE            |
| <chem>O=C1CC2C(C1(C)CC2)(C)C</chem>             | 0.967295825 | CAMPHOR             |
| <chem>CC12C3C1CC(C2(C)C)C3</chem>               | 0.513224721 | TRICYCLENE          |
| <chem>CC1CCC23C1C1C(C1(C)C)CC3(O2)C</chem>      | 0.220384538 | ledene oxide        |
| <chem>C=C1CCC2(C1C2)C(C)C</chem>                | 0.90388757  | SABINENE            |
| <chem>CC(C1CCC2(C3C1C2C(=CC3)C)C)C</chem>       | 0.410767972 | B-YLANGENE          |
| <chem>CC1=CCC2C(O1)(C)CCC1C2(C)CCCC1(C)C</chem> | 0.809511542 | SCLAREOLOXIDE       |
| <chem>C=C1CCC2OC2(CCC2C1CC2(C)C)C</chem>        | 0.479538113 | CARYOPHYLLENE OXIDE |
| <chem>CC(C1CCC2(C1C1C(=C)CCC21)C)C</chem>       | 0.454213738 | B-BOURBONENE        |
| <chem>C=C1C2CCC(C1(C)C)C2</chem>                | 0.877349973 | CAMPHERE            |
| <chem>CC(=C)C1CCC(C2=C(C1)C(C)CC2)C</chem>      | 0.754229069 | A-GUAIENE           |
| <chem>CC1=CCCC(=C)C2C(CC1)C(C2)(C)C</chem>      | 0.817911327 | B-CARYOPHYLLENE     |
| <chem>CC(C1CCC2(C3C1C1C(C21C)C3)C)C</chem>      | 0.227172554 | (+)-CYCLOSATIVENE   |
| <chem>CC(C1CCC(C23C1C2C(=C)CC3)C)C</chem>       | 0.434811652 |                     |
| <chem>CC1CCC2C1C1C(C1(C)C)CCC2=C</chem>         | 0.478167206 | ALLOAROMADENDRENE   |
| <chem>C=C1CCC2CC1C2(C)C</chem>                  | 0.894185781 | B-PINENE            |
| <chem>CC(=C)C1CCC(=C2C(C1)C(C)CC2)C</chem>      | 0.762745261 | A-BULNESENE         |
| <chem>O=C1C2(C)CCC(C1(C)C)C2</chem>             | 0.990963817 | FENCHONE            |
| <chem>CC1=CCC23CC1C(C)(C)C2CC3C</chem>          | 0.900035858 | (-)-ALPHA-CEDRENE   |
| <chem>CC1=CCCC2(C1CC(CC2)C(=C)C)C</chem>        | 0.873063326 | A-SELINENE          |

|                                |             |                       |
|--------------------------------|-------------|-----------------------|
| )C)C                           |             |                       |
| CC1CCC2C31CCC(C(C3)C2(C)C)(C)O | 0.855059028 | CEDROL                |
| C=C1C2CCC3C1(C)CCCC(C23)(C)C   | 0.753828704 | LONGIFOLENE           |
| CC1=CCC2(C3(C1C3)C(C)(C)CCC2)C | 0.96209991  | CIS-THUJOPSENE        |
| C=C1CCC(CC1)C(=C)C             | 0.946295738 | p-Mentha-1(7),8-diene |

b. 13 hits from LigandScout

| Canonical SMILES                        | Prediction score<br>(max = 0) | Molecule                               |
|-----------------------------------------|-------------------------------|----------------------------------------|
| C=CC1(C)CCC(O1)C(O)(C)C                 | 0.00796764                    | LINALOOL OXIDE                         |
| CCCCCCCCC(CC(=O)CCc1ccc(c(c1)OC)O)O     | 0.02227379                    | (10)-Gingerol                          |
| CCCCCCCC(CC(=O)CCc1ccc(c(c1)OC)O)O      | 0.03015545                    | (8)-Gingerol                           |
| CCCCC(CC(=O)CCc1ccc(c(c1)OC)O)O         | 0.04402254                    | 6-Gingerol                             |
| CCCC(CC(=O)CCc1ccc(c(c1)OC)O)O          | 0.06981029                    | (4)-Gingerol                           |
| C=CC(CCC1C(C)(O)CCC2C1(C)CCCC2(C)C)(O)C | 0.0984368                     | SCLAREOL                               |
| CC=Cc1ccc(c(c1)OC)OC                    | 0.13656551                    | METHYL<br>ISOEUGENOL                   |
| C=CCc1ccc(c(c1)OC)OC                    | 0.1922721                     | METHYLEUGENOL                          |
| CCOC(=O)c1cccc1C(=O)OCC                 | 0.30127662                    | DIETHYL<br>PHTHALATE                   |
| COc1cc(CCC(=O)C)ccc1O                   | 0.32397765                    | Zingerone                              |
| CCCCC=CC(=O)CCc1ccc(c(c1)OC)O           | 0.48687789                    | 6-Shogaol                              |
| C=CCc1ccc(c(c1)OC)O                     | 0.50748986                    | EUGENOL                                |
| CC(=O)c1ccc(c(c1)C)O                    | 0.52919221                    | 4-Hydroxy-3-<br>methylacetopheno<br>ne |

**Table S6.** Calcium channel blockers used to train the deep neural network

| CID       | Chemical Name                      | MW    |
|-----------|------------------------------------|-------|
| 656667    | Benidipine hydrochloride           | 542   |
| 44146578  | (-)-alpha-Benidipine hydrochloride | 542   |
| 656668    | Benidipine                         | 505.6 |
| 10029174  | (3S,4'R)-Benidipine HCl            | 505.6 |
| 102601872 | (-)-Alfa-Benidipine HCl            | 542   |
| 5749098   | (3R,4'S)-Benidipine HCl            | 505.6 |
| 71313656  | Rac Benidipine-d5 Hydrochloride    | 547.1 |
| 71776387  | (+)-Alfa-Benidipine HCl            | 542   |
| 123768    | BENIDIPINE HCl                     | 542   |
| 90478234  | Rac-Benidipine HCl                 | 505.6 |

|           |                                                                                                                                                          |       |
|-----------|----------------------------------------------------------------------------------------------------------------------------------------------------------|-------|
| 3088702   | 3,5-Pyridinedicarboxylic acid, 1,4-dihydro-2,6-dimethyl-4-(3-nitrophenyl)-, methyl 1-(phenylmethyl)-3-piperidinyl ester, monohydrochloride, (S-(R*,R*))- | 542   |
| 134694739 | 5-O-(1-Benzylpiperidin-3-yl) 3-O-methyl (4R)-2,6-dimethyl-4-(3-nitrophenyl)-1,4-dihydropyridine-3,5-dicarboxylate;hydrochloride                          | 542   |
| 101526732 | [(4R)-5-[(3R)-1-Benzylpiperidin-1-ium-3-yl]oxycarbonyl-2,6-dimethyl-4-(3-nitrophenyl)-4H-pyridin-3-ylidene]-methoxymethanolate                           | 505.6 |
| 62920     | Diltiazem hydrochloride                                                                                                                                  | 451   |
| 39186     | Diltiazem                                                                                                                                                | 414.5 |
| 3037122   | Diltiazem malate                                                                                                                                         | 548.6 |
| 198107    | L-cis-Diltiazem                                                                                                                                          | 414.5 |
| 3076      | Dilacor XR                                                                                                                                               | 414.5 |
| 101117241 | Diltiazem Sulfoxide                                                                                                                                      | 430.5 |
| 45039052  | Diltiazem-d3 HCl                                                                                                                                         | 454   |
| 67938926  | Diltiazem maleate                                                                                                                                        | 530.6 |
| 129734791 | Diltiazem-carbamazepine                                                                                                                                  | 650.8 |
| 54400293  | Diltiazem N-oxide                                                                                                                                        | 430.5 |
| 71315733  | N-Desmethyl Diltiazem-d4 Hydrochloride                                                                                                                   | 441   |
| 3035956   | 3-(4-Azidobutyryloxy)diltiazem                                                                                                                           | 483.6 |
| 45038852  | Desacetyl Diltiazem-d3                                                                                                                                   | 375.5 |
| 51057199  | Diltiazem 3 Methyl Lactum                                                                                                                                | 315.4 |
| 71315571  | Desacetyl Diltiazem-d6                                                                                                                                   | 378.5 |
| 71315569  | Desacetyl Diltiazem-d4                                                                                                                                   | 376.5 |
| 131700451 | Deacetyl-O-demethyl Diltiazem Hydrochloride                                                                                                              | 394.9 |
| 49849632  | Diltiazem-d4 Hydrochloride                                                                                                                               | 455   |
| 67827136  | US9138393, Diltiazem                                                                                                                                     | 414.5 |
| 145714390 | Des[5-(2-dimethylamino)ethyl] N-Methyl Diltiazem                                                                                                         | 357.4 |
| 139201529 | Diltiazem l-malate                                                                                                                                       | 548.6 |
| 131770006 | N-Desmethyl Diltiazem                                                                                                                                    | 400.5 |
| 122199558 | N,N,O-Tridesmethyl Diltiazem                                                                                                                             | 372.4 |
| 3035520   | 3-(4-Azidobenzoyloxy)diltiazem                                                                                                                           | 517.6 |
| 11068728  | Desacetyl Diltiazem                                                                                                                                      | 372.5 |
| 67937026  | Diltiazem hydroiodide                                                                                                                                    | 542.4 |
| 122199468 | O-Desmethyl Diltiazem Hydrochloride                                                                                                                      | 437   |
| 91810616  | N-Desmethyl desacetyl diltiazem hydrochloride                                                                                                            | 394.9 |
| 91748344  | Diltiazem, M(O-desmethyl-desamino-HO-), AC                                                                                                               | 457.5 |
| 978317    | d-trans-Diltiazem                                                                                                                                        | 414.5 |
| 6957965   | Diltiazem(1+)                                                                                                                                            | 415.5 |
| 10804253  | Diltiazem trans(-)-Hydroxy Lactam                                                                                                                        | 301.4 |
| 23620717  | (+)-trans-Diltiazem hydrochloride                                                                                                                        | 487.4 |
| 45039053  | Diltiazem-d3                                                                                                                                             | 417.5 |



|           |                                                                                                                                         |       |
|-----------|-----------------------------------------------------------------------------------------------------------------------------------------|-------|
| 71315709  | Diltiazem, M(odesmethyl-), AC                                                                                                           | 442.5 |
| 71316027  | N,N-Didesmethyl Diltiazem-d4 Hydrochloride                                                                                              | 427   |
| 75125723  | Desacetyl Diltiazem-d6 hydrochloride                                                                                                    | 415   |
| 131732427 | Diltiazem Eudragit Triethyl Citrate                                                                                                     | 790.9 |
| 122236667 | Desacetyl Diltiazem Hydrochloride (50 mg)                                                                                               | 408.9 |
| 6957646   | Ent-diltiazem(1+)                                                                                                                       | 415.5 |
| 13100698  | Diltiazem Impurity SA19520                                                                                                              | 333.4 |
| 18601406  | (2R-trans)-Diltiazem Hydrochloride                                                                                                      | 451   |
| 45038878  | N-Desmethyl Diltiazem-d3 Hydrochloride                                                                                                  | 440   |
| 71315210  | Deacetyl Diltiazem N-Oxide                                                                                                              | 388.5 |
| 71316026  | N,N-Didesmethyl Diltiazem Hydrochloride                                                                                                 | 422.9 |
| 71433758  | O-Desmethyl Diltiazem                                                                                                                   | 437   |
| 75125722  | Diltiazem-d6 hydrochloride                                                                                                              | 457   |
| 126456094 | Deacetyl-O-demethyl Diltiazem Hydrobromide                                                                                              | 439.4 |
| 14391644  | N-Demethyldiltiazem hydrochloride                                                                                                       | 437   |
| 158945    | 1,5-Benzothiazepin-4(5H)-one, 2,3-dihydro-3-hydroxy-2-(4-methoxyphenyl)-5-(2-(methylamino)ethyl)-, (2S,3S)-                             | 358.5 |
| 198106    | (2R-cis)-3-Acetoxy-5-(2-(dimethylamino)ethyl)-2,3-dihydro-2-(4-methoxyphenyl)-1,5-benzothiazepin-4(5H)-one monohydrochloride            | 451   |
| 91638     | Deacetyldiltiazem                                                                                                                       | 372.5 |
| 2733673   | (2S,3s)-3-Hydroxy-2-(4-methoxyphenyl)-2,3-dihydro-1,5-benzothiazepin-4(5h)-one                                                          | 301.4 |
| 11110671  | (2S)-cis-3-(Acetyloxy)-2,3-dihydro-2-(4-methoxyphenyl)-1,5-benzothiazepin-4(5H)-one                                                     | 343.4 |
| 107891    | N-Demethyldiltiazem                                                                                                                     | 400.5 |
| 10021324  | O-Demethyldeacetyldiltiazem                                                                                                             | 358.5 |
| 124580970 | (2S,3S)-5-(2-Aminoethyl)-3-hydroxy-2-(4-hydroxyphenyl)-2,3-dihydro-1,5-benzothiazepin-4-one                                             | 330.4 |
| 124929793 | 2-[(2R,3R)-3-Hydroxy-2-(4-methoxyphenyl)-4-oxo-2,3-dihydro-1,5-benzothiazepin-5-yl]-N,N-dimethylethanamine oxide                        | 388.5 |
| 91810591  | O-Demethyldeacetyldiltiazem hydrochloride                                                                                               | 394.9 |
| 10472681  | Deacetyl-N,O-didemethyldiltiazem                                                                                                        | 344.4 |
| 214464    | 3-Acetoxy-5-[2-(dimethylamino)ethyl]-2,3-dihydro-2-(4-methoxyphenyl)-1,5-benzothiazepin-4(5H)-one monohydrochloride                     | 451   |
| 12449426  | Deacetyldiltiazem hydrochloride                                                                                                         | 408.9 |
| 71315570  | (2S,3S)-3-Hydroxy-2-(4-methoxyphenyl)-5-[2-[methyl(trideuteriomethyl)amino]ethyl]-2,3-dihydro-1,5-benzothiazepin-4-one                  | 375.5 |
| 75125720  | [(2S,3S)-2-(4-Methoxyphenyl)-5-[2-(methylamino)ethyl]-4-oxo-2,3-dihydro-1,5-benzothiazepin-3-yl] 2,2,2-trideuterioacetate;hydrochloride | 440   |

|           |                                                                                                                                        |        |
|-----------|----------------------------------------------------------------------------------------------------------------------------------------|--------|
| 218444    | 1,5-Benzothiazepin-4(5H)-one, 2,3-dihydro-5-(2-(dimethylamino)ethyl)-3-hydroxy-2-(p-hydroxyphenyl)-, monohydrochloride                 | 394.9  |
| 131632891 | [(2R,3R)-5-[2-[Bis(trideuteriomethyl)amino]ethyl]-2-(4-methoxyphenyl)-4-oxo-2,3-dihydro-1,5-benzothiazepin-3-yl] acetate;hydrochloride | 457    |
| 978318    | [(2~{S},3~{R})-5-[2-(Dimethylamino)ethyl]-2-(4-methoxyphenyl)-4-oxidanylidene-2,3-dihydro-1,5-benzothiazepin-3-yl] ethanoate           | 414.5  |
| 218442    | 1,5-Benzothiazepin-4(5H)-one, 2,3-dihydro-5-(2-(dimethylamino)ethyl)-3-hydroxy-2-(p-methoxyphenyl)-, monohydrochloride, (Z)-           | 408.9  |
| 5282407   | Flunarizine hydrochloride                                                                                                              | 477.4  |
| 941361    | Flunarizine                                                                                                                            | 404.5  |
| 129318432 | Flunarizine N-Oxide Dihydrochloride                                                                                                    | 493.4  |
| 35353     | Flunarizine * 2HCl                                                                                                                     | 477.4  |
| 6438877   | Hydroxy Flunarizine                                                                                                                    | 420.5  |
| 14386607  | Flunarizine impurity B                                                                                                                 | 386.5  |
| 129318431 | 4-Defluoro 2-Fluoro Flunarizine                                                                                                        | 404.5  |
| 1711971   | 1-[Bis(4-fluorophenyl)methyl]-4-[(Z)-3-phenyl-2-propenyl]piperazine                                                                    | 404.5  |
| 3784      | Isradipine                                                                                                                             | 371.4  |
| 10406778  | Dehydro Isradipine                                                                                                                     | 369.4  |
| 29976815  | Dehydro Isradipine Lactone                                                                                                             | 353.3  |
| 45039616  | Isradipine-d3                                                                                                                          | 374.4  |
| 46782005  | Isradipine Lactone                                                                                                                     | 355.3  |
| 20161387  | Demethyl Propionitrile Isradipine                                                                                                      | 410.4  |
| 158617    | 3,5-Pyridinedicarboxylic acid, 4-(2,1,3-benzoxadiazol-4-yl)-1,4-dihydro-2,6-dimethyl-, methyl 1-methylethyl ester, (4S)-               | 371.4  |
| 14519595  | 4-(2,1,3-Benzoxadiazol-4-yl)-1,4-dihydro-2,6-dimethyl-3,5-pyridinedicarboxylic acid, 3-(1-methylethyl) ester                           | 357.4  |
| 41114     | Nicardipine hydrochloride                                                                                                              | 516    |
| 4474      | Nicardipine                                                                                                                            | 479.5  |
| 3017161   | Nicardipine pyridine metabolite II                                                                                                     | 477.5  |
| 6604415   | (S)-Nicardipine                                                                                                                        | 479.5  |
| 56841549  | Moexipril mixture with nicardipine                                                                                                     | 1014.6 |
| 6603948   | (R)-Nicardipine                                                                                                                        | 479.5  |
| 66587092  | (S)-Nicardipine hydrochloride                                                                                                          | 516    |
| 71750994  | Nicardipine D3 (hydrochloride)                                                                                                         | 519    |
| 73416090  | (R)-Nicardipine hydrochloride                                                                                                          | 516    |
| 529921    | Nicardipine M (dehydro-desamino-carboxy, methyl ester)                                                                                 | 402.4  |
| 129318587 | Nicardipine N-Oxide                                                                                                                    | 495.5  |
| 12609737  | Dehydro Nicardipine Hydrochloride                                                                                                      | 514    |

|           |                                                                                                                                                                                                                                                                                                                                                                |        |
|-----------|----------------------------------------------------------------------------------------------------------------------------------------------------------------------------------------------------------------------------------------------------------------------------------------------------------------------------------------------------------------|--------|
| 529922    | Nicardipine M (dehydro-desamino-hydroxy)                                                                                                                                                                                                                                                                                                                       | 374.3  |
| 177986    | Nicardipine phosphate                                                                                                                                                                                                                                                                                                                                          | 577.5  |
| 45040010  | Nicardipine-d3                                                                                                                                                                                                                                                                                                                                                 | 482.5  |
| 12529164  | De-benzylated nicardipine                                                                                                                                                                                                                                                                                                                                      | 389.4  |
| 529924    | Dimethyl 2,6-dimethyl-4-(3-nitrophenyl)pyridine-3,5-dicarboxylate                                                                                                                                                                                                                                                                                              | 344.32 |
| 173322    | 5-(Methoxycarbonyl)-2,6-dimethyl-4-(3-nitrophenyl)-1,4-dihydropyridine-3-carboxylic acid                                                                                                                                                                                                                                                                       | 332.31 |
| 4485      | Nifedipine                                                                                                                                                                                                                                                                                                                                                     | 346.3  |
| 15364971  | Nifedipine pyrimidine                                                                                                                                                                                                                                                                                                                                          | 398.4  |
| 45040023  | Nifedipine D6                                                                                                                                                                                                                                                                                                                                                  | 352.37 |
| 13599653  | Hydroxydehydro Nifedipine Carboxylate                                                                                                                                                                                                                                                                                                                          | 346.29 |
| 13599652  | Hydroxy Dehydro Nifedipine Lactone                                                                                                                                                                                                                                                                                                                             | 328.28 |
| 63011     | Nifedipine hydrochloride                                                                                                                                                                                                                                                                                                                                       | 382.8  |
| 89082     | M-Nifedipine                                                                                                                                                                                                                                                                                                                                                   | 346.3  |
| 10592508  | Desmethyl hydroxymethyl nifedipine lactone                                                                                                                                                                                                                                                                                                                     | 330.29 |
| 45038793  | Dehydro Nifedipine-d6                                                                                                                                                                                                                                                                                                                                          | 350.35 |
| 49849384  | [13C8]-Oxidized nifedipine                                                                                                                                                                                                                                                                                                                                     | 352.26 |
| 49849382  | Nifedipine-13C8, 99 atom % 13C                                                                                                                                                                                                                                                                                                                                 | 354.28 |
| 86742527  | Nifedipine isothiocyanate                                                                                                                                                                                                                                                                                                                                      | 404.4  |
| 129762646 | Dihydropyridyl nifedipine                                                                                                                                                                                                                                                                                                                                      | 425.4  |
| 129669919 | Bromo-nifedipine                                                                                                                                                                                                                                                                                                                                               | 425.2  |
| 529925    | Nifedipine M (dehydro-bis-carboxy, methyl ester)                                                                                                                                                                                                                                                                                                               | 388.3  |
| 129780964 | o-(Trifluoro-methyl)phenyl nifedipine                                                                                                                                                                                                                                                                                                                          | 490.4  |
| 129693714 | Cisplatin nifedipine                                                                                                                                                                                                                                                                                                                                           | 526.4  |
| 129669923 | 4-Nitro nifedipine                                                                                                                                                                                                                                                                                                                                             | 391.3  |
| 129669924 | 4-Bromo nifedipine                                                                                                                                                                                                                                                                                                                                             | 425.2  |
| 129724666 | Nifedipine lactate                                                                                                                                                                                                                                                                                                                                             | 434.4  |
| 128753    | Dimethyl 2,6-dimethyl-4-(2-nitrophenyl)-3,5-pyridinedicarboxylate                                                                                                                                                                                                                                                                                              | 344.32 |
| 128034    | Dimethyl 2,6-dimethyl-4-(2-nitrosophenyl)pyridine-3,5-dicarboxylate                                                                                                                                                                                                                                                                                            | 328.32 |
| 173322    | 5-(Methoxycarbonyl)-2,6-dimethyl-4-(3-nitrophenyl)-1,4-dihydropyridine-3-carboxylic acid                                                                                                                                                                                                                                                                       | 332.31 |
| 54167661  | 2,6-Dimethyl-4-(2-nitrophenyl)-3,4-dihydropyridine-3,5-dicarboxylic acid dimethyl ester                                                                                                                                                                                                                                                                        | 346.3  |
| 486145    | (3S,6S,9S,12R,15R,18S,21S,24S,27S)-3,6-Dibenzyl-15-(1-hydroxy-1-methyl-ethyl)-18-isobutyl-9,21-diisopropyl-4,10,16,22-tetramethyl-24-[(1S)-1-methylpropyl]-12-[(1R)-1-methylpropyl]-13-oxa-1,4,7,10,16,19,22,25-octazabicyclo[25.3.0]triacontane-2,5,8,11,14,17,20,23,26-nonone; dimethyl 2,6-dimethyl-4-(2-nitrophenyl)-1,4-dihydropyridine-3,5-dicarboxylate | 1447.8 |
| 461539    | 1-[4-[4-[[[(2R,4S)-2-(2,4-Dichlorophenyl)-2-(imidazol-                                                                                                                                                                                                                                                                                                         | 877.8  |

|           |                                                                                                                                                     |        |
|-----------|-----------------------------------------------------------------------------------------------------------------------------------------------------|--------|
|           | 1-ylmethyl)-1,3-dioxolan-4-yl]methoxy]phenyl]piperazin-1-yl]ethanone; dimethyl 2,6-dimethyl-4-(2-nitrophenyl)-1,4-dihydropyridine-3,5-dicarboxylate |        |
| 152434    | Dimethyl 2,6-dimethyl-4-(4-nitrophenyl)-1,4-dihydropyridine-3,5-dicarboxylate                                                                       | 346.3  |
| 489226    | Dimethyl 2,6-dimethyl-4-(2-nitrophenyl)-1,4-dihydropyridine-3,5-dicarboxylate; 2-(2-methyl-5-nitro-imidazol-1-yl)ethanol                            | 517.5  |
| 4497      | Nimodipine                                                                                                                                          | 418.4  |
| 529928    | Dehydro nimodipine                                                                                                                                  | 416.4  |
| 101749934 | Monohydroxy of nimodipine                                                                                                                           | 434.4  |
| 15953942  | Ketoconazole & Nimodipine                                                                                                                           | 949.9  |
| 529929    | Nimodipine M (dehydro-desisopropyl-O-desmethyl, methyl ester)                                                                                       | 388.4  |
| 529930    | Nimodipine M (dehydro-desmethoxyethyl, methyl ester)                                                                                                | 372.4  |
| 91748590  | Nimodipine M (dehydro-O-desmethyl-carboxy, methyl ester)                                                                                            | 416.4  |
| 157132    | 3,5-Pyridinedicarboxylic acid, 1,4-dihydro-2,6-dimethyl-4-(3-nitrophenyl)-, 2-methoxyethyl 1-methylethyl ester, (4R)-                               | 418.4  |
| 157133    | 3,5-Pyridinedicarboxylic acid, 1,4-dihydro-2,6-dimethyl-4-(3-nitrophenyl)-, 2-methoxyethyl 1-methylethyl ester, (4S)-                               | 418.4  |
| 10431202  | Unii-96S4GG1upr                                                                                                                                     | 402.4  |
| 13219259  | 2-Hydroxyethyl 2-methyl-4-(3-nitrophenyl)-5-oxo-5,7-dihydrofuro(3,4-b)pyridine-3-carboxylate                                                        | 358.3  |
| 10453860  | 2-Hydroxyethyl isopropyl 1,4-dihydro-2,6-dimethyl-4-(3-nitrophenyl)pyridine-3,5-dicarboxylate                                                       | 404.4  |
| 529921    | Nicardipine M (dehydro-desamino-carboxy, methyl ester)                                                                                              | 402.4  |
| 529924    | Dimethyl 2,6-dimethyl-4-(3-nitrophenyl)pyridine-3,5-dicarboxylate                                                                                   | 344.32 |
| 2520      | Verapamil                                                                                                                                           | 454.6  |
| 62969     | Verapamil hydrochloride                                                                                                                             | 491.1  |
| 12249889  | (-)-Verapamil Hydrochloride                                                                                                                         | 491.1  |
| 65808     | Dexverapamil                                                                                                                                        | 454.6  |
| 92305     | (-)-Verapamil                                                                                                                                       | 454.6  |
| 24847846  | Trandolapril and Verapamil Hydrochloride                                                                                                            | 921.6  |
| 86585500  | Verapamil verapamil hydrochloride                                                                                                                   | 945.7  |
| 16220090  | (R)-(+)-Verapamil (hydrochloride)                                                                                                                   | 509.1  |
| 627485    | Desisopropyl N-propyl verapamil                                                                                                                     | 454.6  |
| 137314795 | Verapamil & Rifampicin                                                                                                                              | 1277.5 |
| 5312288   | [11C]-Verapamil                                                                                                                                     | 453.6  |
| 127053753 | Bodipy-verapamil                                                                                                                                    | 732.7  |
| 21124838  | R-Verapamil HCl                                                                                                                                     | 477    |
| 45359134  | Nor Verapamil-d7, Hydrochloride                                                                                                                     | 484.1  |

|           |                                                                                |        |
|-----------|--------------------------------------------------------------------------------|--------|
| 134814874 | Verapamil & Amikacin                                                           | 1040.2 |
| 134814746 | Verapamil & Ethidium Bromide                                                   | 769    |
| 71596372  | TDR58845 with verapamil                                                        | 704.3  |
| 134815124 | Verapamil & Ofloxacin                                                          | 816    |
| 157039    | p-O-Desmethyl Verapamil                                                        | 440.6  |
| 57358013  | Desisopropyl ethyl verapamil                                                   | 440.6  |
| 71596237  | TDR58846 with verapamil                                                        | 732.4  |
| 134815085 | Verapamil & Isoniazid                                                          | 591.7  |
| 46783239  | Verapamil Ethyl Methanethiosulfonate, Bromide                                  | 673.7  |
| 492231    | Trifluralin & Verapamil                                                        | 789.9  |
| 69842939  | Verapamil-nitrate                                                              | 517.6  |
| 71315157  | D 517-d7 Hydrochloride (Verapamil Impurity)                                    | 484.1  |
| 129722827 | Verapamil vanadate                                                             | 569.5  |
| 129712053 | Verapamil alcohol                                                              | 470.6  |
| 101529637 | Nor Verapamil N- A-D-Glucuronide                                               | 616.7  |
| 45359132  | Verapamil-D7 Hydrochloride                                                     | 498.1  |
| 46781152  | p-O-Desmethyl p-O-Benzyl Verapamil                                             | 530.7  |
| 71312145  | S(-)-Verapamil hydrochloride hydrate, >=98% (HPLC), powder                     | 509.1  |
| 129861714 | Verapamil tartrate                                                             | 600.7  |
| 129675778 | Azido-verapamil                                                                | 495.6  |
| 126456044 | (S)-(-)-Verapamil-d6 Hydrochloride                                             | 497.1  |
| 146681202 | (R)-Verapamil D7 (hydrochloride)                                               | 498.1  |
| 6429774   | Verapamil, M(nor-), AC                                                         | 482.6  |
| 46783238  | Verapamil-d6 Hydrochloride                                                     | 497.1  |
| 129773950 | Verapamil rhodamine                                                            | 556.5  |
| 129777606 | Acetyl verapamil                                                               | 496.6  |
| 129646102 | Verapamil chloride                                                             | 489    |
| 5748292   | Nab-verapamil                                                                  | 607.8  |
| 135121636 | Verapamil hydrate                                                              | 472.6  |
| 57323485  | N-Desmethyl Verapamil-d7 HCl                                                   | 267.4  |
| 486141    | Aureobasidin A & Verapamil                                                     | 1556   |
| 129667933 | Carboxy verapamil                                                              | 498.6  |
| 170014    | Dexverapamil Hydrochloride                                                     | 491.1  |
| 93168     | 3-(3,4-Dimethoxyphenyl)-2-methyl-6-methylamino-hexane-3-carbonitrile           | 290.4  |
| 71315155  | D-517 Hydrochloride                                                            | 477    |
| 8419      | Veratraldehyde                                                                 | 166.17 |
| 7118      | 3,4-Dimethoxybenzyl alcohol                                                    | 168.19 |
| 104972    | Norverapamil                                                                   | 440.6  |
| 155002    | Norverapamil hydrochloride                                                     | 477    |
| 129318328 | 5,5'-(Methylimino)bis(2-(3,4-dimethoxyphenyl)-2-(1-methylethyl)pentanenitrile) | 549.7  |
| 15593907  | Arverapamil                                                                    | 440.6  |

|           |                                                                                                                                                                                                                                                                                                                |        |
|-----------|----------------------------------------------------------------------------------------------------------------------------------------------------------------------------------------------------------------------------------------------------------------------------------------------------------------|--------|
| 72941683  | N,N'-Bis(2-(3,4-dimethoxyphenyl)ethyl)-N,N'-dimethylpropane-1,3-diamine                                                                                                                                                                                                                                        | 430.6  |
| 6603929   | (S)-Gallopamil                                                                                                                                                                                                                                                                                                 | 484.6  |
| 10863369  | (2R)-2-(3,4-Dimethoxyphenyl)-5-[2-(3,4-dimethoxyphenyl)ethyl-methylamino]-2-propan-2-ylpentanenitrile                                                                                                                                                                                                          | 453.6  |
| 12883724  | (S)-Gallopamil hydrochloride                                                                                                                                                                                                                                                                                   | 521.1  |
| 16205097  | [7-Cyano-1,7-bis(3,4-dimethoxyphenyl)nonan-3-yl]ammonium chloride                                                                                                                                                                                                                                              | 477    |
| 461538    | 1-[4-[4-[[[(2R,4S)-2-(2,4-Dichlorophenyl)-2-(imidazol-1-ylmethyl)-1,3-dioxolan-4-yl]methoxy]phenyl]piperazin-1-yl]ethanone; 2-(3,4-dimethoxyphenyl)-5-[2-(3,4-dimethoxyphenyl)ethyl-methyl-amino]-2-isopropyl-pentanenitrile                                                                                   | 986    |
| 355506    | N,N-Dimethylhomoveratrylamine                                                                                                                                                                                                                                                                                  | 209.28 |
| 355505    | 2-(3,4-Dimethoxyphenyl)-N,N-dimethylethanamine hydrochloride                                                                                                                                                                                                                                                   | 245.74 |
| 56842608  | CID 56842608                                                                                                                                                                                                                                                                                                   | 477    |
| 137552081 | 2,6-Bis(3,4-dimethoxyphenyl)-2,6-bis(1-methylethyl)-heptane-1,7-dinitrile                                                                                                                                                                                                                                      | 478.6  |
| 7048574   | Dexverapamil(1+)                                                                                                                                                                                                                                                                                               | 455.6  |
| 71308442  | (R)-Gallopamil hydrochloride                                                                                                                                                                                                                                                                                   | 521.1  |
| 86579834  | (2S,3R,4R)-4-(6-Bromo-2-methoxy-3-quinolyl)-1-(dimethylamino)-3-(1-naphthyl)-4-phenyl-butan-2-ol; (2S)-2-(3,4-dimethoxyphenyl)-5-[2-(3,4-dimethoxyphenyl)ethyl-methyl-amino]-2-isopropyl-pentanenitrile; (2R)-2-(3,4-dimethoxyphenyl)-5-[2-(3,4-dimethoxyphenyl)ethyl-methyl-amino]-2-isopropyl-pentanenitrile | 1464.7 |
| 197910    | 3,4-Dimethoxy-N-methylphenethylamine hydrochloride                                                                                                                                                                                                                                                             | 231.72 |
| 71315156  | (2RS)-2-(3,4-Dimethoxyphenyl)-2-(2-((2-(3,4-dimethoxy-phenyl)ethyl)(methyl)amino)ethyl)-3-methylbutanenitrile                                                                                                                                                                                                  | 440.6  |
| 72941684  | 5,5'-((2-(3,4-Dimethoxyphenyl)ethyl)imino)bis(2-(3,4-dimethoxyphenyl)-2-(1-methylethyl)pentanenitrile)                                                                                                                                                                                                         | 699.9  |
| 89396     | 2-(3,4-Dimethoxyphenyl)-3-methylbutanenitrile                                                                                                                                                                                                                                                                  | 219.28 |
| 577693    | N-Methyl-N-(3-chloropropyl)homoveratrylamine                                                                                                                                                                                                                                                                   | 271.78 |

**Supplementary Table 7.** Plasmids and oligonucleotides designed and used in this study

| <b>Plasmid</b>    | <b>Description and Cloning Strategy</b>                                                                                                                                           | <b>Reference or source</b> |
|-------------------|-----------------------------------------------------------------------------------------------------------------------------------------------------------------------------------|----------------------------|
| pCav1.2           | pcDNA3.1(+)-derived constitutive Cacna1c expression vector (P <sub>hCMV</sub> -Cacna1c-pA) (Addgene no. 26572).                                                                   | (Helton et al., 2005)      |
| pCav1.3           | pcDNA3.1(+)-derived constitutive Cacna1d expression vector (P <sub>hCMV</sub> -Cacna1d-pA) (Addgene no. 49333).                                                                   | (Xu and Lipscombe, 2001)   |
| pCav1.3:Δ42a      | pcDNA3.1(+)-derived constitutive Cacna1d (exon 42a was deleted) expression vector (P <sub>hCMV</sub> -Cacna1d:Δ42a-pA) (Addgene no. 49332).                                       | (Xu and Lipscombe, 2001)   |
| pCav2.2           | pcDNA3.1(+)-derived constitutive Cacna1b expression vector (P <sub>hCMV</sub> -Cacna1b-pA) (Addgene no. 26569).                                                                   | (Bell et al., 2004)        |
| pCavb3            | pcDNA3.1(+)-derived constitutive Cacnb3 expression vector (P <sub>hCMV</sub> -Cacnb3-pA) (Addgene no. 26574).                                                                     | (Lin et al., 2004)         |
| pCaVα2δ1          | pcDNA3.1(+)-derived constitutive Cacna2d1 expression vector (P <sub>hCMV</sub> -Cacna2d1-pA) (Addgene no. 26575).                                                                 | (Lin et al., 2004)         |
| pcDNA3.1(+)       | Mammalian expression vector (P <sub>hCMV</sub> -MCS-pA).                                                                                                                          | Invitrogen, CA             |
| pDsRed-Express-DR | Promoter-less vector encoding DsRed-Express (DsRed-Express-pA).                                                                                                                   | Clontech, CA               |
| pFS119            | P <sub>NFAT3</sub> -driven TurboGFP:dest1 expression vector (P <sub>NFAT3</sub> -TurboGFP:dest1-pA; P <sub>NFAT3</sub> , (NFAT <sub>IL4</sub> ) <sub>5</sub> -P <sub>min</sub> ). | (Xie et al., 2016)         |
| pHY30             | P <sub>NFAT1</sub> -driven SEAP expression vector (P <sub>NFAT1</sub> -SEAP-pA; P <sub>NFAT1</sub> , (NFAT <sub>IL2</sub> ) <sub>3</sub> -P <sub>min</sub> ).                     | (Ye et al., 2011)          |

|                |                                                                                                                                     |                          |
|----------------|-------------------------------------------------------------------------------------------------------------------------------------|--------------------------|
| pKK56          | Constitutive <i>Cacna2d1</i> and <i>Cacnb3</i> expression vector ( $P_{hEF1\alpha}$ - <i>Cacna2d1</i> -P2A- <i>Cacnb3</i> -pA).     | (Xie et al., 2016)       |
| pMM54          | Tetracycline-responsive d2YFP expression vector ( $P_{hCMV*1}$ -d2YFP-pA).                                                          | (Muller et al., 2017)    |
| pMX57          | $P_{NFAT3}$ -driven SEAP expression vector ( $P_{NFAT3}$ -SEAP-pA; $P_{NFAT3}$ , (NFAT <sub>IL4</sub> ) <sub>5</sub> - $P_{min}$ ). | (Xie et al., 2016)       |
| pMX58          | $P_{NFAT4}$ -driven SEAP expression vector ( $P_{NFAT4}$ -SEAP-pA; $P_{NFAT4}$ , (NFAT <sub>IL4</sub> ) <sub>7</sub> - $P_{min}$ ). | (Xie et al., 2016)       |
| pMX59          | $P_{NFAT5}$ -driven SEAP expression vector ( $P_{NFAT5}$ -SEAP-pA; $P_{NFAT5}$ , (NFAT <sub>IL4</sub> ) <sub>9</sub> - $P_{min}$ ). | (Xie et al., 2016)       |
| pMX109         | $P_{NFAT3}$ -driven PMS expression vector ( $P_{NFAT3}$ -PMS-pA).                                                                   | (Wang et al., 2018)      |
| pSA91          | Erythromycin-responsive L7Ae expression vector ( $P_{ETR2}$ -L7Ae-pA).                                                              | (Auslander et al., 2012) |
| pSEAP2-Control | Constitutive SEAP expression vector ( $P_{SV40}$ -SEAP-pA).                                                                         | Clontech, CA             |
| pSP16          | $P_{CREm}$ -driven SEAP expression vector ( $P_{CREm}$ -SEAP-pA).                                                                   | (Saxena et al., 2016)    |
| pWH5           | Paraben-inducible SEAP expression vector ( $P_{PMS}$ -SEAP-pA).                                                                     | (Wang et al., 2015)      |
| pWH9           | Constitutive PMS expression vector ( $P_{SV40}$ -PMS-pA).                                                                           | (Wang et al., 2015)      |
| pWH17          | Constitutive PMS expression vector ( $P_{hCMV}$ -PMS-pA).                                                                           | (Wang et al., 2018)      |
| pWH29          | $P_{NFAT3}$ -driven GLuc expression vector ( $P_{NFAT3}$ -GLuc-pA).                                                                 | (Xie et al.,             |



|        |                                                                                                                                                                                                                                                                                                                                                                                                                                                                   |                             |
|--------|-------------------------------------------------------------------------------------------------------------------------------------------------------------------------------------------------------------------------------------------------------------------------------------------------------------------------------------------------------------------------------------------------------------------------------------------------------------------|-----------------------------|
|        |                                                                                                                                                                                                                                                                                                                                                                                                                                                                   | 2016)                       |
| pWH90  | P <sub>CRE2</sub> -driven SEAP-expression vector (P <sub>CRE2</sub> -SEAP-pA).                                                                                                                                                                                                                                                                                                                                                                                    | (Wang et al., 2018)         |
| pMX252 | SB100X-specific transposon containing a constitutive BFP and PuroR expression unit and a constitutive Cacna1d expression unit (ITR-P <sub>hEF1<math>\alpha</math></sub> -Cacna1d-pA:P <sub>RPBSA</sub> -BFP-P2A-PuroR-pA-ITR).                                                                                                                                                                                                                                    | (Xie et al., 2016)          |
| pViM41 | Prokaryotic mCherry expression vector (P <sub>T7</sub> -mCherry-MCS).                                                                                                                                                                                                                                                                                                                                                                                             | Viviani et al., unpublished |
| pMX89  | Constitutive DsRed-Express expression vector (P <sub>SV40</sub> -DsRed-Express-pA).<br>DsRed-Express was PCR-amplified from pDsRed-Express-DR using oligonucleotides OMX97 (5'-caacagaattccaccATGGCCTCCTCCGAGGACGTCATCAAGGAG-3') and OMX98 (5'-gatcctctagattaCTACACATTGATCCTAGCAGAAGCAC-3'), restricted with <i>EcoRI/XbaI</i> and cloned into the corresponding sites of pSEAP2-Control.                                                                         | This work                   |
| pMX112 | P <sub>NFAT5</sub> -driven PMS expression vector (P <sub>NFAT5</sub> -PMS-pA).<br>P <sub>NFAT5</sub> was excised from pMX59 using <i>MluI/EcoRI</i> and ligated into the corresponding sites ( <i>MluI/EcoRI</i> ) of pWH17.                                                                                                                                                                                                                                      | This work                   |
| pMX124 | P <sub>NFAT3</sub> -driven L7Ae expression vector (P <sub>NFAT3</sub> -L7Ae-pA).<br>L7Ae was PCR-amplified from pSA91 using oligonucleotides OMX188 (5'-gttggtaaagaattctgcagtcgacggtaccgcgggcccgggatccaccggtcgCCACCATGTACGTGCGCTTCGAGGTGCCCG-3') and OMX189 (5'-catgtctgctcgaagcggccggccgccccgactctagagtcgcggccgcgcatTCACTTCTGCAGGCCCTTGATCTTTTCAC-3'), restricted with <i>EcoRI/FseI</i> and cloned into the corresponding sites ( <i>EcoRI/FseI</i> ) of pWH34. | This work                   |
| pMX125 | P <sub>NFAT4</sub> -driven L7Ae expression vector (P <sub>NFAT4</sub> -L7Ae-pA).<br>L7Ae was PCR-amplified from pSA91 using oligonucleotides OMX188 (5'-gttggtaaagaattctgcagtcgacggtaccgcgggcccgggatccaccggtcgCCACCATGTACGTGCGCTTCGAGGTGCCCG-3') and OMX189 (5'-catgtctgctcgaagcggccggccgccccgactctagagtcgcggccgcgcatTCACTTCTGCAGGCCCTTGATCTTTTCAC-3'), restricted with <i>EcoRI/FseI</i> and cloned into the corresponding sites ( <i>EcoRI/FseI</i> ) of pWH35. | This work                   |

|        |                                                                                                                                                                                                                                                                                                                                                                                                                                                                                                       |           |
|--------|-------------------------------------------------------------------------------------------------------------------------------------------------------------------------------------------------------------------------------------------------------------------------------------------------------------------------------------------------------------------------------------------------------------------------------------------------------------------------------------------------------|-----------|
| pMX126 | <p><math>P_{NFAT5}</math>-driven L7Ae expression vector (<math>P_{NFAT5}</math>-L7Ae-pA).<br/> L7Ae was PCR-amplified from pSA91 using oligonucleotides OMX188 (5'-<br/> gttgtaaagaattctgcagtcgacgggtaccgcggggccgggatccaccggtcgCCACCATGTACGTGCGCTTCGAGGTG<br/> CCCG-3') and OMX189 (5'-<br/> catgtctgctcgaagcggcggccgccccgactctagagtcgcgccgcgcatTCACTTCTGCAGGCCCTTGATCTTTTC<br/> CAC-3'), restricted with <i>EcoRI/FseI</i> and cloned into the corresponding sites (<i>EcoRI/FseI</i>) of pWH36.</p> | This work |
| pMX195 | <p>L7Ae-repressible SEAP expression vector (<math>P_{SV40}</math>-(C/Dbox)<sub>1</sub>-SEAP-pA).<br/> SEAP was PCR-amplified from pWH5 using oligonucleotides OMX195 (5'-<br/> ctttgcaaaaagcttcaccgggctgatccgaaaggtgaccgggtggaattcgcCCACCATGCTGCTGCTGCTGCTGCTGCT<br/> GGG-3') and OMX24 (5'-CTTGAGCACATAGCCTGGACCGTTTCCGTA-3'), restricted with<br/> <i>HindIII/NdeI</i> and cloned into the corresponding sites (<i>HindIII/NdeI</i>) of pWH5.</p>                                                   | This work |
| pMX199 | <p>L7Ae-repressible SEAP expression vector (<math>P_{SV40}</math>-(C/Dbox)<sub>2</sub>-SEAP-pA).<br/> SEAP was PCR-amplified from pWH5 using oligonucleotides OMX199 (5'-<br/> gcaaaaagcttcaccgggctgatccgaaaggtgaccgggtgagagacgaccgaagggcgtgatccgaaaggtgacccttcgggaattcgcCCA<br/> CCATGCTGCTGCTGCTGCTGCTGCTGCTG -3') and OMX24 (5'-<br/> CTTGAGCACATAGCCTGGACCGTTTCCGTA-3'), restricted with <i>HindIII/NdeI</i> and cloned into the<br/> corresponding sites (<i>HindIII/NdeI</i>) of pWH5.</p>      | This work |
| pWH17  | <p>Constitutive PMS expression vector (<math>P_{hCMV}</math>-PMS-pA).<br/> PMS was excised from pWH09 using <i>NotI/XbaI</i> and ligated into the corresponding sites (<i>NotI/XbaI</i>) of<br/> pcDNA3.1(+).</p>                                                                                                                                                                                                                                                                                     | This work |
| pWH31  | <p><math>P_{cFOS}</math>-driven SEAP expression vector (<math>P_{cFOS}</math>-SEAP-pA; <math>P_{cFOS}</math>, (c-fos)<sub>3</sub>-<math>P_{min}</math>).<br/> OMX123 (5'-ctagCAGCCTGACGTTTCAGAGACTGACGTTTCAGAGACTGACGTTTCAGATCTC-<br/> 3') and OMX126 (5'-<br/> tcgaGAGATCTGAAACGTCAGTCTCTGAAACGTCAGTCTCTGAAACGTCAGGCTG-3') were<br/> annealed and cloned into the <i>XhoI/NheI</i>-restricted pSP16.</p>                                                                                             | This work |
| pWH34  | <p><math>P_{NFAT3}</math>-driven d2YFP expression vector (<math>P_{NFAT3}</math>-d2YFP-pA).<br/> <math>P_{NFAT3}</math> was excised from pMX57 using <i>MluI/EcoRI</i> and ligated into the corresponding sites<br/> (<i>MluI/EcoRI</i>) of pMM54.</p>                                                                                                                                                                                                                                                | This work |

|        |                                                                                                                                                                                                                                                                                                                                                                                                                                                                                                                                                                                                                                                                                       |           |
|--------|---------------------------------------------------------------------------------------------------------------------------------------------------------------------------------------------------------------------------------------------------------------------------------------------------------------------------------------------------------------------------------------------------------------------------------------------------------------------------------------------------------------------------------------------------------------------------------------------------------------------------------------------------------------------------------------|-----------|
| pWH35  | P <sub>NFAT4</sub> -driven d2YFP expression vector (P <sub>NFAT4</sub> -d2YFP-pA).<br>P <sub>NFAT4</sub> was excised from pMX58 using <i>MluI/EcoRI</i> and ligated into the corresponding sites ( <i>MluI/EcoRI</i> ) of pMM54.                                                                                                                                                                                                                                                                                                                                                                                                                                                      | This work |
| pWH36  | P <sub>NFAT5</sub> -driven d2YFP expression vector (P <sub>NFAT5</sub> -d2YFP-pA).<br>P <sub>NFAT5</sub> was excised from pMX59 using <i>MluI/EcoRI</i> and ligated into the corresponding sites ( <i>MluI/EcoRI</i> ) of pMM54.                                                                                                                                                                                                                                                                                                                                                                                                                                                      | This work |
| pWH37  | P <sub>NFAT3</sub> -driven DsRed-Express expression vector (P <sub>NFAT3</sub> -DsRed-Express-pA).<br>P <sub>NFAT3</sub> was excised from pMX57 using <i>MluI/EcoRI</i> and ligated into the corresponding sites ( <i>MluI/EcoRI</i> ) of pMX89.                                                                                                                                                                                                                                                                                                                                                                                                                                      | This work |
| pWH75  | P <sub>NFAT4</sub> -driven PMS expression vector (P <sub>NFAT4</sub> -PMS-pA).<br>P <sub>NFAT4</sub> was excised from pMX58 using <i>NheI/EcoRI</i> and ligated into the compatible sites ( <i>SpeI/EcoRI</i> ) of pWH17.                                                                                                                                                                                                                                                                                                                                                                                                                                                             | This work |
| pWH135 | L7Ae-repressible SEAP expression vector (P <sub>SV40</sub> -(C/Dbox) <sub>4</sub> -SEAP-pA).<br>Custom-designed (C/Dbox) <sub>4</sub> synthesized from gBlocks <sup>®</sup> was digested with <i>HindIII/EcoRI</i> , and ligated into the corresponding sites ( <i>HindIII/EcoRI</i> ) of pSEAP2-control.                                                                                                                                                                                                                                                                                                                                                                             | This work |
| pWH145 | Constitutive L7Ae expression vector (P <sub>hCMV</sub> -L7Ae-pA).<br>L7Ae was excised from pSA91 using <i>NheI/XbaI</i> and ligated into the compatible sites ( <i>NheI/XbaI</i> ) of pcDNA3.1(+).                                                                                                                                                                                                                                                                                                                                                                                                                                                                                    | This work |
| pWH154 | Constitutive Cav1.3 <sup>Y1048A</sup> expression vector (P <sub>hCMV</sub> -Cacna1d <sup>Y1048A</sup> -pA).<br>Fragment 1 was PCR-amplified from pMX252 using oligonucleotides OLYL301(5'-ggagacccaagctggtgcgcccaccATGCAGCATCAACG-3') and OLYL302 (5'-ATGATGATggcGATAATGAAGAAGATGGAGATCTCCACACG-3'), Fragment 2 was PCR-amplified from pMX252 using oligonucleotides OLYL303 (5'-TTCATTATCgccATCATCATCGTGGCCTTCTTCATG-3') and OLYL304(5'-gctggatatctgcagaattcCTCATCAGAGCATCCGTTCAAGCATC-3'), both fragments were cloned into the corresponding sites ( <i>NheI/EcoRI</i> ) of pcDNA3.1(+) by homologous recombination using the ClonExpress <sup>®</sup> MultiS One Step Cloning Kit. | This work |

|        |                                                                                                                                                                                                                                                                                                                                                                                                                                                                                                                                                                                                                                                                                                                                                        |           |
|--------|--------------------------------------------------------------------------------------------------------------------------------------------------------------------------------------------------------------------------------------------------------------------------------------------------------------------------------------------------------------------------------------------------------------------------------------------------------------------------------------------------------------------------------------------------------------------------------------------------------------------------------------------------------------------------------------------------------------------------------------------------------|-----------|
| pWH155 | Constitutive Cav1.3 <sup>Y1365A, A1369S, I1372A</sup> expression vector (P <sub>hCMV</sub> - Cacna1d <sup>Y1365A, A1369S, I1372A</sup> -pA).<br>Fragment 1 was PCR-amplified from pMX252 using oligonucleotides OLYL301(5'-<br>ggagacccaagctggtagcggccaccATGCAGCATCAACG-3') and OLYL305 (5'-<br>gcCAGGAAgctACAGAGCATGgcAAAGCTGATGAAGTAGACAATGGC-3'), Fragment 2 was PCR-<br>amplified from pMX252 using oligonucleotides OLYL306 (5'-<br>gcCATGCTCTGTgcTTCCTGgcCATCAACCTCTTCGTGGCTGTCATC-3') and OLYL304(5'-<br>gctggatatctgcagaattcCTCATCAGAGCATCCGTTCAAGCATC-3'), both fragments were cloned into the<br>corresponding sites ( <i>NheI/EcoRI</i> ) of pcDNA3.1(+) by homologous recombination using the<br>ClonExpress® MultiS One Step Cloning Kit. | This work |
|--------|--------------------------------------------------------------------------------------------------------------------------------------------------------------------------------------------------------------------------------------------------------------------------------------------------------------------------------------------------------------------------------------------------------------------------------------------------------------------------------------------------------------------------------------------------------------------------------------------------------------------------------------------------------------------------------------------------------------------------------------------------------|-----------|

**Oligonucleotides:** Restriction endonuclease-recognition sites are underlined and annealing nucleotides are shown in capital letters.

**Abbreviations:** **BFP**, blue fluorescent protein; **Cav1.2**, member 2 of the Cav1 family of L-type voltage-gated Ca<sup>2+</sup> channels; **Cacna1c**,  $\alpha$ 1-subunit of mouse Cav1.2 (NCBI Gene ID: 12288); **Cav1.3**, member 3 of the Cav1 family of L-type voltage-gated Ca<sup>2+</sup> channels; **Cav1.3<sup>AXB</sup>**, synthetic Cav1.3 mutant in which amino acid A at position X of the  $\alpha$ 1-subunit is replaced with amino acid B; **Cav2.2**, N-type voltage-gated Ca<sup>2+</sup> channel; **Cacna1d**,  $\alpha$ 1-subunit of rat Cav1.3 (NCBI Gene ID: 29716); **Cacna1d<sup>AXB</sup>**, mutant  $\alpha$ 1-subunit of Cav1.3 in which amino acid A at position X is replaced with amino acid B; **Cacna1d: $\Delta$ 42a**, Cacna1d-isoform lacking exon 42; **Cacna1b**,  $\alpha$ 1-subunit of rat Cav2.2 (NCBI Gene ID: 257648); **Cacnb3**,  $\beta$ 3-subunit of rat Cav1.3 (NCBI Gene ID: 25297); **Cacna2d1**,  $\alpha$ 2 $\delta$ -subunit of rat Cav1.3 (NCBI Gene ID: 25399); **C/D-box**, L7Ae-specific RNA aptamer (sequence: 5'-GGGCGUGAUCCGAAAGGUGACCC-3'); **c-fos**, human proto-oncogene from the Fos family of transcription factors; **CRE**, cAMP-response element (CREB1 binding site); **d2YFP**, destabilized variant of yellow fluorescent protein; **DsRed-Express**, destabilized variant of *Discosoma sp.* red fluorescent protein; **GLuc**, *Gaussia princeps* luciferase; **IL4**, murine interleukin 4; **KRAB**, Krueppel-associated box protein of the human kox-1 gene; **L7Ae**, archaeal ribosomal protein; **MCS**, multiple cloning site; **NFAT**, nuclear factor of activated T-cells; **O<sub>PmeR2</sub>**, tandem PmeR-specific operator; **P2A**, picornavirus-derived ribosome skipping sequence (N'-GATNFSLLKQAGDVEENPGP-C') optimized for bicistronic expression in mammalian cells; **pA**, polyadenylation signal; **PCR**, polymerase chain reaction; **P<sub>CRE2</sub>**, synthetic mammalian promoter containing six CRE repeats; **P<sub>CREm</sub>**, modified P<sub>CRE</sub> variant; **P<sub>cFOS</sub>**, synthetic mammalian promoter containing three c-fos tandem repeats; **PEST**, peptide sequence rich in proline, glutamic acid, serine and threonine; **P<sub>ETR2</sub>**, erythromycin-responsive promoter; **P<sub>hCMV</sub>**, human cytomegalovirus immediate early promoter; **P<sub>hCMV\*-1</sub>**, tetracycline-responsive promoter (tetO<sub>7</sub>-P<sub>hCMVmin</sub>); **P<sub>hEF1 $\alpha$</sub>** , human elongation factor 1 $\alpha$  promoter; **PmeR**, *Pseudomonas syringae pathovar tomato* DC3000-derived multidrug efflux pump repressor; **PMS**, PmeR-derived paraben-mediated mammalian transsilencer (PmeR-KRAB); **P<sub>PMS</sub>**, paraben-inducible promoter (P<sub>SV40</sub>-O<sub>PmeR2</sub>); **P<sub>NFAT1</sub>**, synthetic mammalian promoter containing three tandem repeats of a human IL2 NFAT-binding site ((NFAT<sub>IL2</sub>)<sub>3</sub>-P<sub>min</sub>); **P<sub>NFAT3</sub>**, synthetic mammalian promoter containing five tandem repeats of a IL4-derived NFAT-binding site; **P<sub>NFAT4</sub>**, synthetic mammalian promoter containing seven tandem repeats of a IL4-derived NFAT-binding site **P<sub>NFAT5</sub>**, synthetic mammalian promoter containing nine tandem repeats of a IL4-derived NFAT-binding site; **P<sub>SV40</sub>**, simian virus 40 promoter; **P<sub>T7</sub>**, promoter

activated by the T7 bacteriophage RNA polymerase; **PuroR**, gene conferring puromycin resistance; **SB100X**, optimized Sleeping Beauty transposase; **SEAP**, human placental secreted alkaline phosphatase; **TetR**, *Escherichia coli* Tn10-derived tetracycline-dependent repressor of the tetracycline resistance gene; **tetO<sub>7</sub>**, TetR-specific heptameric operator sequence; **TurboGFP:dest1**, PEST-tagged TurboGFP variant (Evrogen).

**Table S8.** FDA-approved drugs used in this manuscript

|                             | <b>Cat. No.</b> | <b>Source</b>                     |
|-----------------------------|-----------------|-----------------------------------|
| Amitriptyline hydrochloride | A8404           | Sigma-Aldrich, Buchs, Switzerland |
| Nifedipine                  | N7634           | Sigma-Aldrich, Buchs, Switzerland |
| Tetracaine hydrochloride    | T7508           | Sigma-Aldrich, Buchs, Switzerland |
| Benidipine hydrochloride    | B-120           | Alomone Labs, Jerusalem, Israel   |
| Diltiazem hydrochloride     | D-135           | Alomone Labs, Jerusalem, Israel   |
| Flunarizine dihydrochloride | F-110           | Alomone Labs, Jerusalem, Israel   |
| Isradipine                  | I-100           | Alomone Labs, Jerusalem, Israel   |
| Nicardipine HCl             | N-125           | Alomone Labs, Jerusalem, Israel   |
| Nimodipine                  | N-150           | Alomone Labs, Jerusalem, Israel   |
| Verapamil HCl               | V-100           | Alomone Labs, Jerusalem, Israel   |
| Lidocaine                   | L-105           | Alomone Labs, Jerusalem, Israel   |

## Supporting References

- Auslander, S., Auslander, D., Muller, M., Wieland, M., and Fussenegger, M. (2012). Programmable single-cell mammalian biocomputers. *Nature* 487, 123-127.
- Bell, T.J., Thaler, C., Castiglioni, A.J., Helton, T.D., and Lipscombe, D. (2004). Cell-specific alternative splicing increases calcium channel current density in the pain pathway. *Neuron* 41, 127-138.
- Helton, T.D., Xu, W., and Lipscombe, D. (2005). Neuronal L-type calcium channels open quickly and are inhibited slowly. *The Journal of neuroscience : the official journal of the Society for Neuroscience* 25, 10247-10251.
- Lin, Y., McDonough, S.I., and Lipscombe, D. (2004). Alternative splicing in the voltage-sensing region of N-Type CaV2.2 channels modulates channel kinetics. *Journal of neurophysiology* 92, 2820-2830.
- Muller, M., Auslander, S., Spinnler, A., Auslander, D., Sikorski, J., Folcher, M., and Fussenegger, M. (2017). Designed cell consortia as fragrance-programmable analog-to-digital converters. *Nature chemical biology* 13, 309-316.
- Saxena, P., Heng, B.C., Bai, P., Folcher, M., Zulewski, H., and Fussenegger, M. (2016). A programmable synthetic lineage-control network that differentiates human iPSCs into glucose-sensitive insulin-secreting beta-like cells. *Nature communications* 7, 11247.
- Wang, H., Xie, M., Charpin-El Hamri, G., Ye, H., and Fussenegger, M. (2018). Treatment of chronic pain by designer cells controlled by spearmint aromatherapy. *Nat Biomed Eng* 2, 114-123.
- Wang, H., Ye, H., Xie, M., Daoud El-Baba, M., and Fussenegger, M. (2015). Cosmetics-triggered percutaneous remote control of transgene expression in mice. *Nucleic acids research* 43, e91.
- Xie, M., Ye, H., Wang, H., Charpin-El Hamri, G., Lormeau, C., Saxena, P., Stelling, J., and Fussenegger, M. (2016). beta-cell-mimetic designer cells provide closed-loop glycaemic control. *Science* 354, 1296-1301.
- Xu, W., and Lipscombe, D. (2001). Neuronal Ca(V)1.3alpha(1) L-type channels activate at relatively hyperpolarized membrane potentials and are incompletely inhibited by dihydropyridines. *The Journal of neuroscience : the official journal of the Society for Neuroscience* 21, 5944-5951.
- Ye, H., Daoud-El Baba, M., Peng, R.W., and Fussenegger, M. (2011). A synthetic optogenetic transcription device enhances blood-glucose homeostasis in mice. *Science* 332, 1565-1568.
